# Supplementary material for: Effects of 2010 Hurricane Earl amidst geologic evidence for greater overwash at Anegada, British Virgin Islands
Source: Copernicus journal article supplement (doi:10.5194/adgeo-38-21-2014), 2014-03-07

*Supplementary material for*

**Effects of 2010 Hurricane Earl amidst geologic evidence for greater overwash at Anegada,  
British Virgin Islands**

**Figure S1.** Overview maps.

S1-1, Regional and local index maps. Airphoto mosaic in D courtesy of British Virgin Islands Department of Disaster Management.

S1-2, Geologic sketch maps adapted from Atwater et al. (2012b).

**Figure S2.** Uranium-series dating of Pleistocene coral.

**Figure S3.** Limits of storm surge and storm waves of Hurricane Earl.

S3-1, Windlass Bight.

S3-2 West of The Settlement.

S3-3, Within The Settlement.

S3-4, East of The Settlement.

**Figure S4.** Spillover landforms on south shore.

S4-1, Near inlet to western salt ponds.

S4-2, West of The Settlement.

**Figure S5.** Spillover stratigraphy on south shore.

S5-1, Overview.

S5-2, Deposits of western fan.

S5-3, Deposits of eastern fan. Radiocarbon ages expressed as an activity ratio were converted to sidereal years with the calibration data of Hua and Barbetti (2004) and the calibration program of Reimer and Reimer (2012). The earliest age from the eastern fan (NOSAMS-89526) was calibrated with the Intcal09 data of Reimer et al. (2009).

**Figure S6.** Comparisons between microbial detritus of Hurricane Earl and evidence for catastrophic overwash in 1650-1800 or earlier.

S6-1, Geologic setting after Atwater et al. (2012b).

S6-2, Breach north of Bumber Well Pond.

S6-3, Boulder in breach north of Red Pond.

S6-4, Cobble field in northeast Red Pond.

S6-5, Brain-coral head on playa west of Red Pond. Coral ages computed with marine-reservoir correction  $\Delta R$  of 0 14C yr BP (Kilbourne et al., 2007) to -200 14C yr BP (<http://calib.qub.ac.uk/marine/>), Marine09 calibration data of Reimer et al. (2009), and version 6.1 of the calibration software introduced by Stuiver and Reimer (1986).

**Figure S1-1 Index maps** [page 1 of 2]

**A** Perspective diagram looking eastward

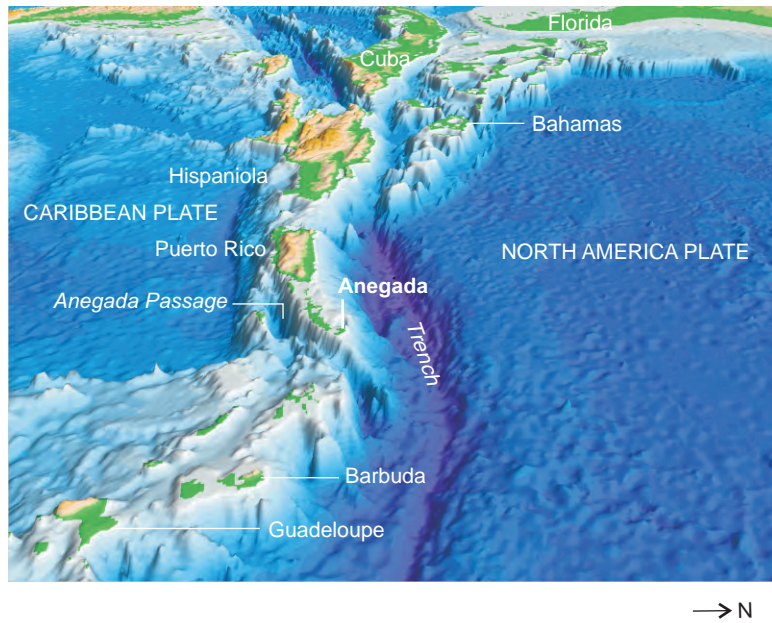

**D** Mosaic of rectified airphotos of Anegada taken 2002

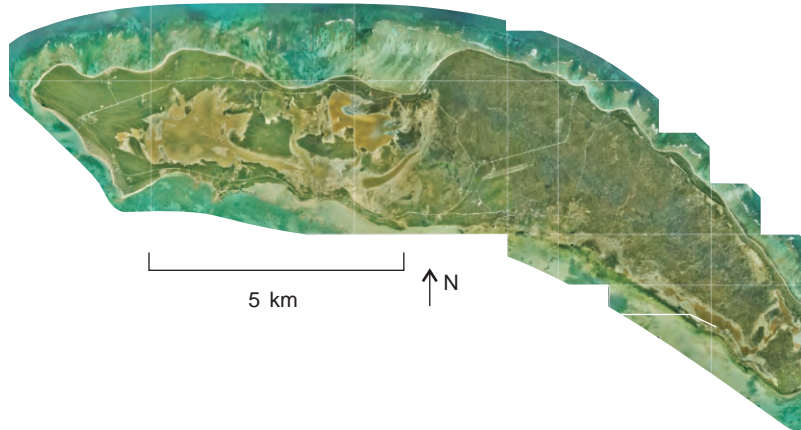

**B** Tracks of hurricanes Donna and Earl

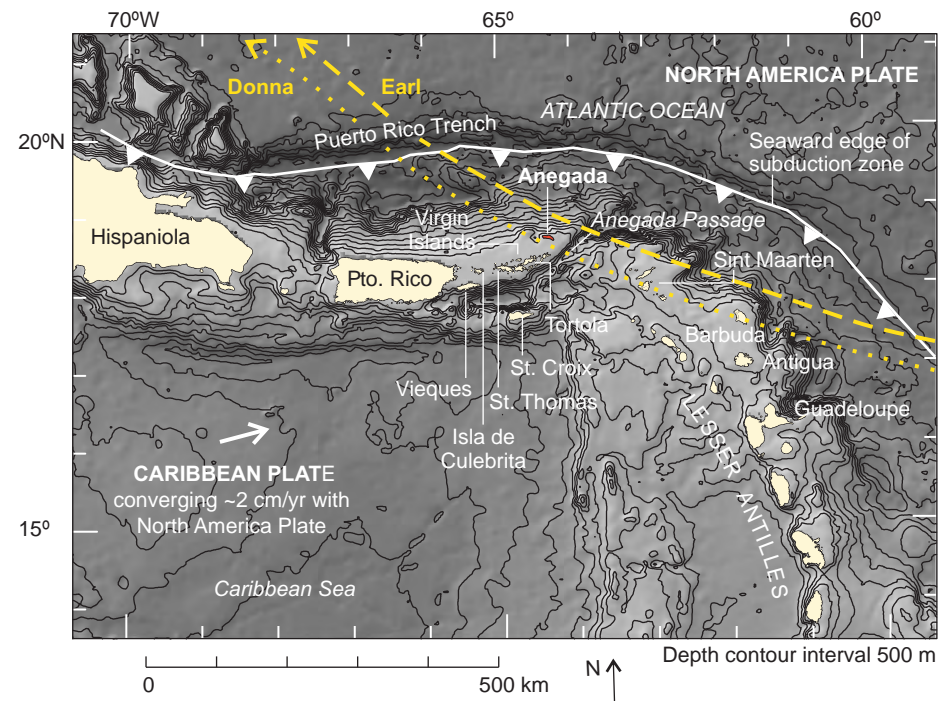

**C** Track of Hurricane Earl as it approached and passed Anegada

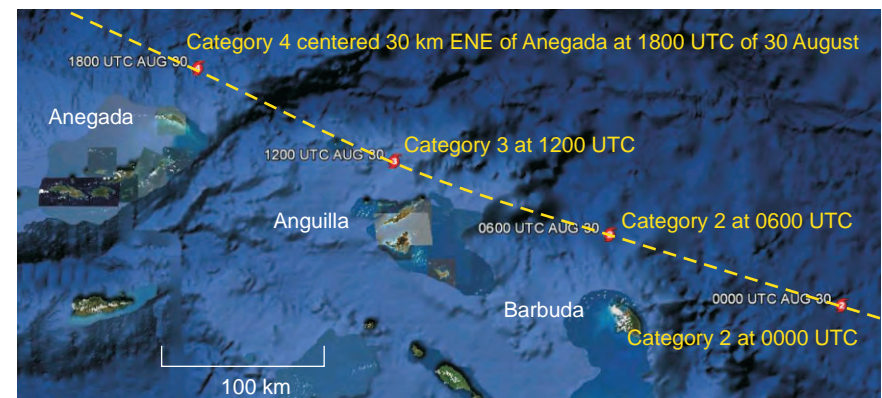

National Hurricane Center kmz file al072010

**Figure S1-2 Geologic sketch maps [page 2 of 2]**

**A Anegada**

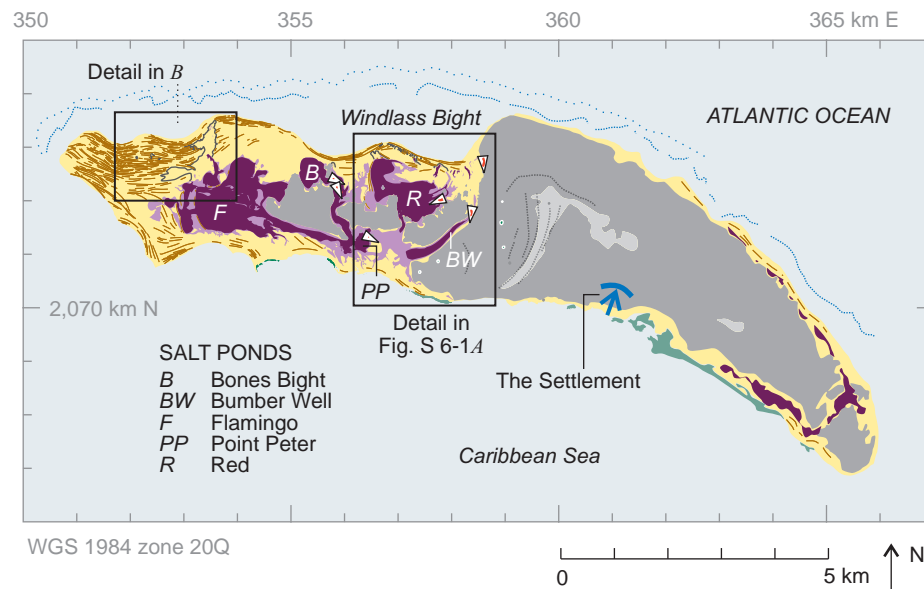

**B Breaches of two different ages**

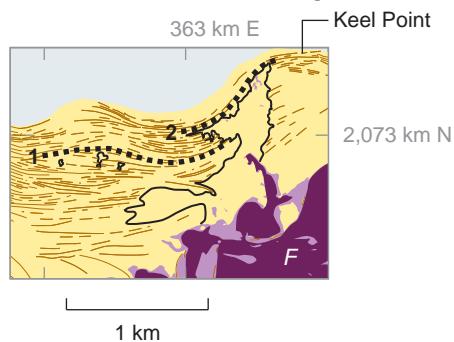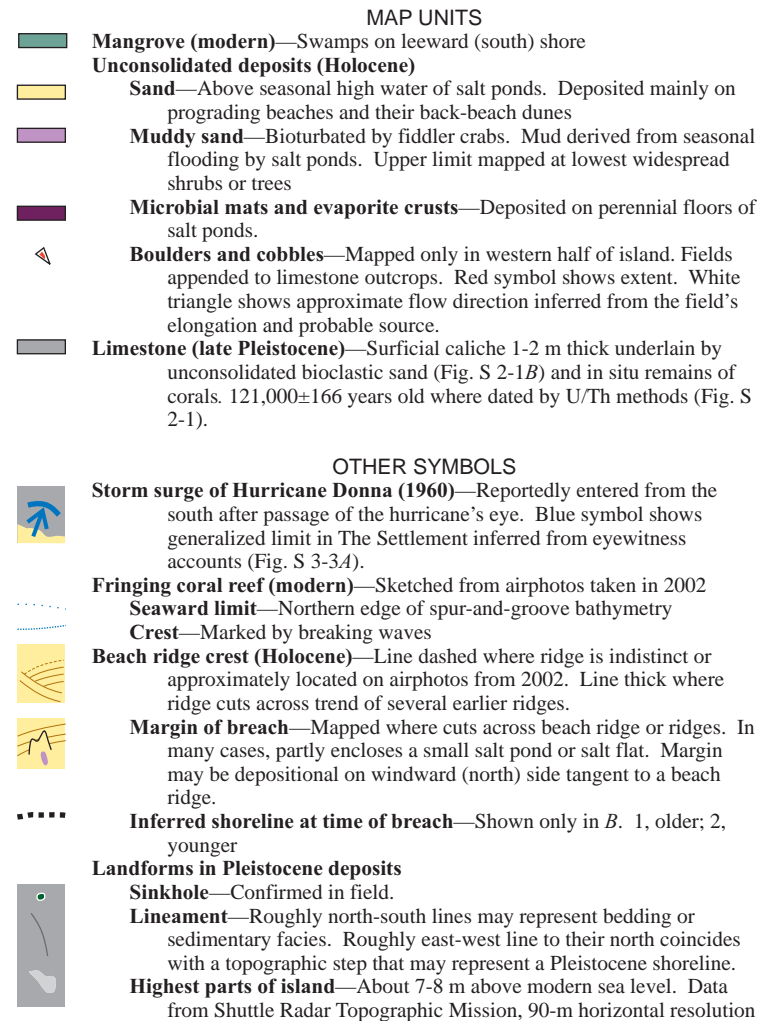

**C and D** after Fig. S 2 of Atwater and others



**Figure S2-1 Pleistocene corals** sampled from sand pit and dated to 121,000 years ago [continued on next page]

**A Setting** of sand pit in mosaic of rectified airphotos taken 2002

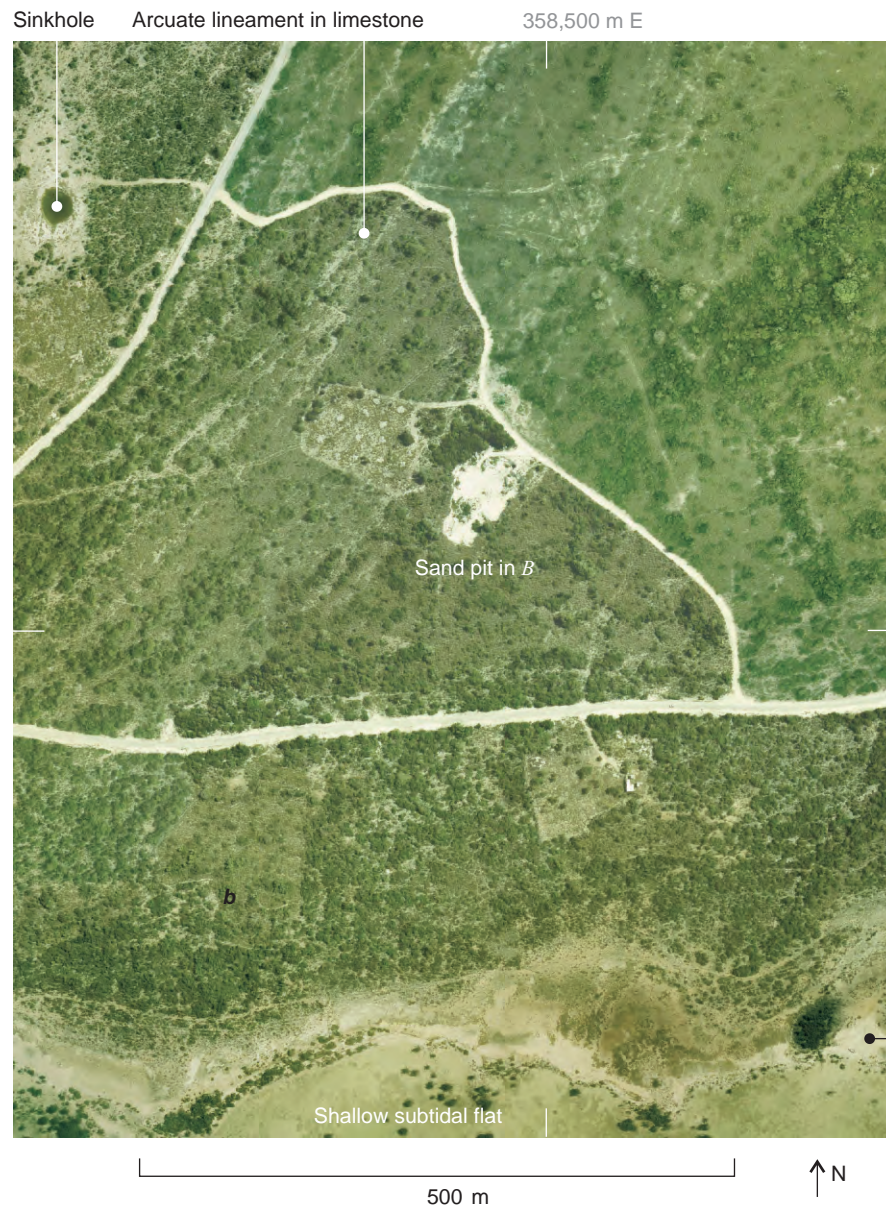

**B Northwest wall** of pit

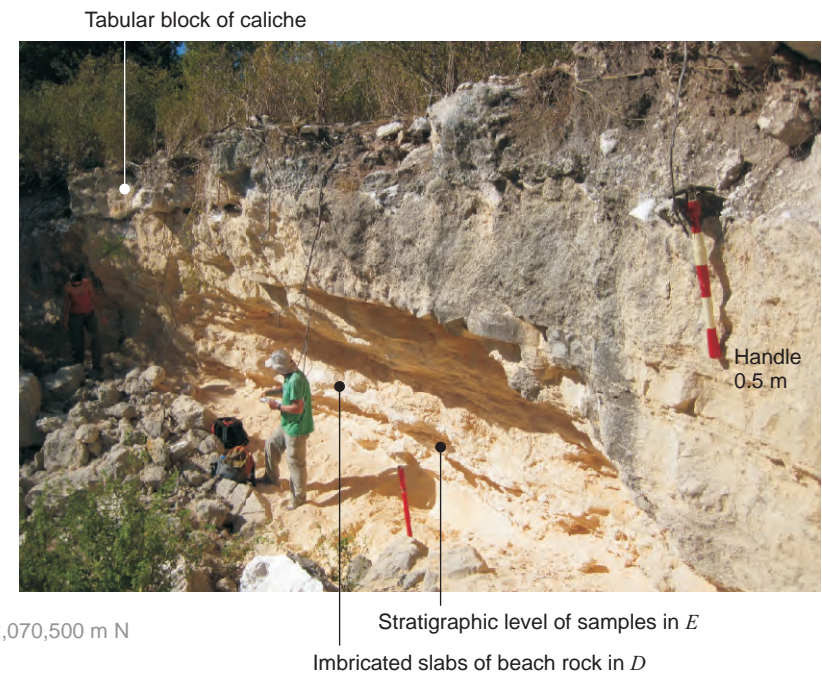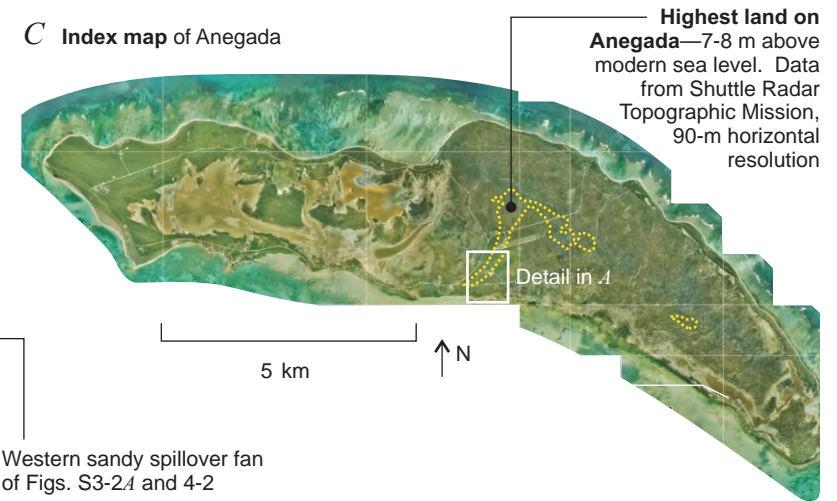



**Figure S2-1 Pleistocene corals** sampled from sand pit and dated to 121,000 years ago [continued from previous page]

*D* Beach rock slabs

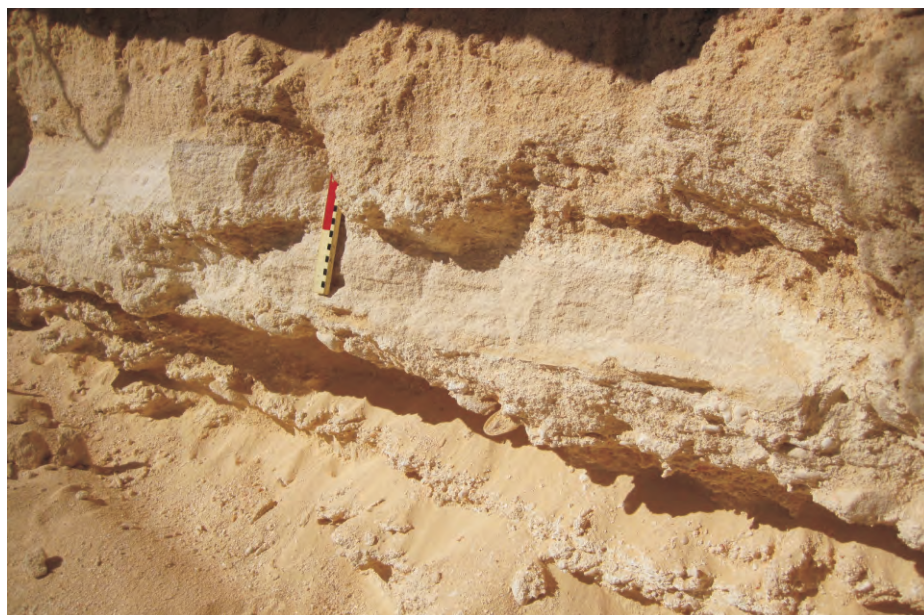

Scale 20 cm (upper 6 cm partly hidden)

*E* *Porites furcata* collected for U/Th dating

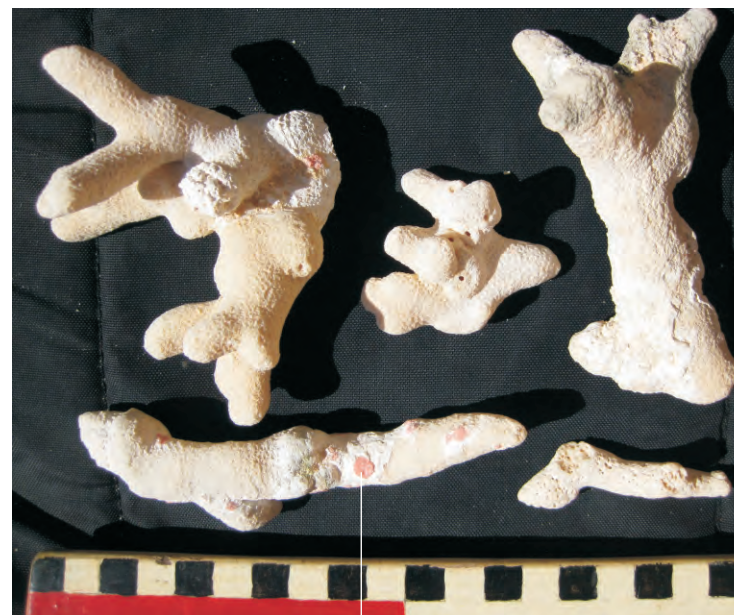

*Homotrema rubra*

Squares 1 cm

*F* **Results** reported by William G. Thompson,  
Woods Hole Oceanographic Institution

|                                                           |                     |                                            |                                                                                                                          |
|-----------------------------------------------------------|---------------------|--------------------------------------------|--------------------------------------------------------------------------------------------------------------------------|
| $^{234}\text{U}/^{238}\text{U}$                           | $1.1044 \pm 0.0002$ | Measured activity ratios <sup>1</sup>      | Decay series<br>↓<br>$^{238}\text{U}$<br>$^{234}\text{Pa}$<br>$^{234}\text{Th}$<br>$^{234}\text{U}$<br>$^{230}\text{Th}$ |
| $^{230}\text{Th}/^{238}\text{U}$                          | $0.7509 \pm 0.0001$ |                                            |                                                                                                                          |
| Corrected age (yr)                                        | $121,110 \pm 166$   | Computed from activity ratios <sup>2</sup> |                                                                                                                          |
| Conventional age (yr)                                     | $121,096 \pm 57$    |                                            |                                                                                                                          |
| Initial $^{234}\text{U}/^{238}\text{U}$ ( $\delta$ , ppt) | $147.0 \pm 0.3$     | Tests of closed system <sup>3</sup>        |                                                                                                                          |
| U (ppm)                                                   | $2.4942 \pm 0.0004$ |                                            |                                                                                                                          |
| $^{232}\text{Th}$ (ppb)                                   | $0.9513 \pm 0.0002$ |                                            |                                                                                                                          |

All uncertainties at two standard deviations

<sup>1</sup> For half lives of  $245,290 \pm 490$  yr ( $^{234}\text{U}$ ) and  $75,690 \pm 230$  ( $^{230}\text{Th}$ ) (Cheng and others, 2000)

<sup>2</sup> As in Supplementary Table 2 of Thompson and others (2011). In the conventional age, a closed system is assumed. In the corrected age, exchange of U and Th with the environment is allowed, as measured by tests above.

<sup>3</sup> Tests for exchange of U and Th with the environment. The initial  $^{234}\text{U}/^{238}\text{U}$ , computed from the age and the measured  $^{234}\text{U}/^{238}\text{U}$  ratio, is within the interglacial oceanic range of Holocene data compiled by Thompson and others (2011, Supplementary Figure 1). The measured U concentration is within the 1.9-3.6 ppm range of  $^{238}\text{U}$  in living corals, while the  $^{232}\text{Th}$  concentration is higher than the quality-control threshold of 0.4 ppb of Thompson and others (2011, Supplementary Table 1).



**Figure S3-1 Storm-water limits near Windlass Bight [page 1 of 2]**

**A Index map of Windlass Bight**

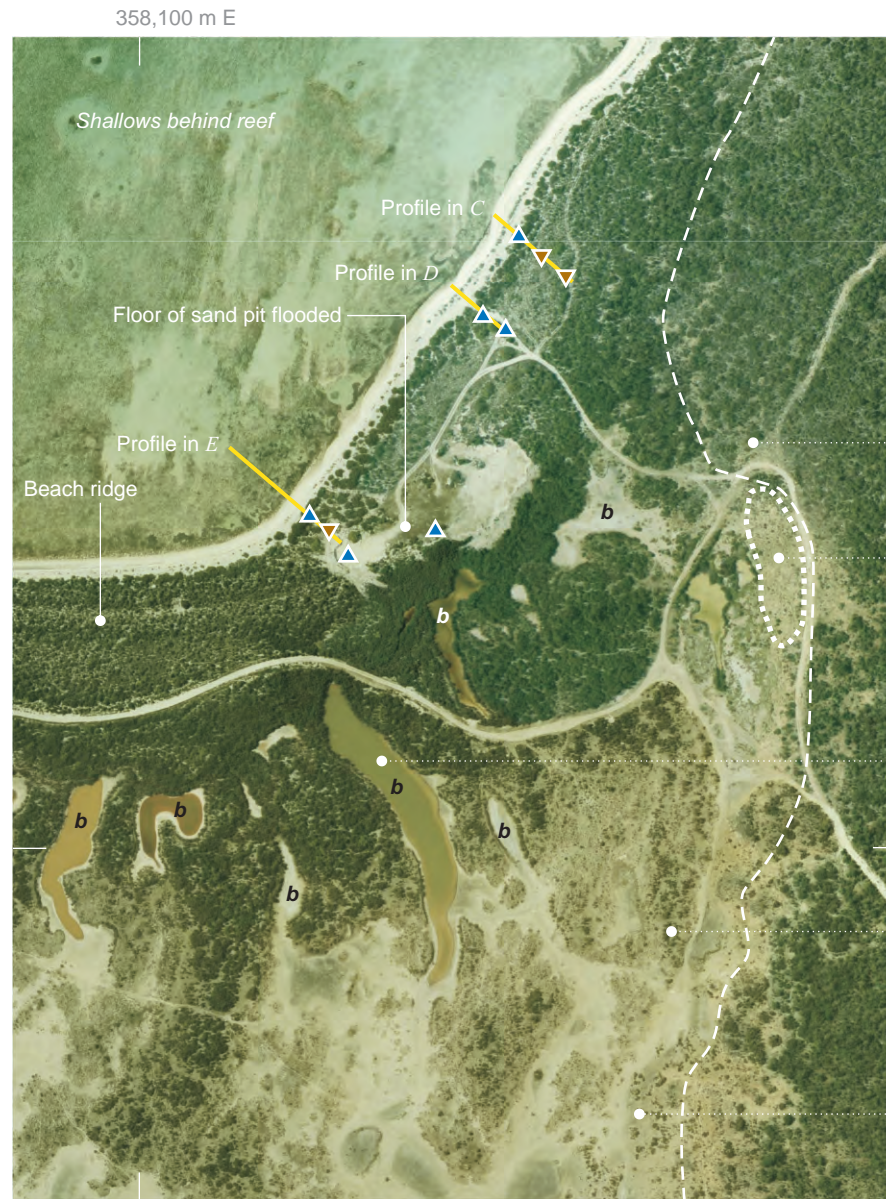

**B Index map of Anegada**

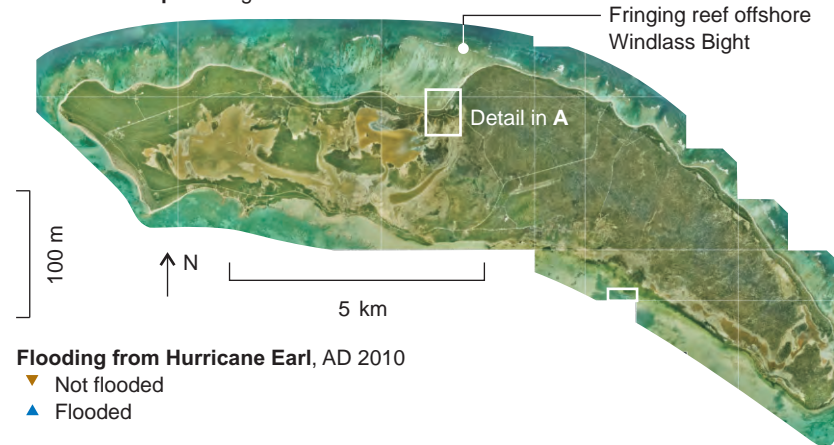

**Flooding from Hurricane Earl, AD 2010**

- ▼ Not flooded
- ▲ Flooded

**Limestone (caliche)**—At surface in most areas east of dashed white line

**Field of limestone boulders** emplaced by catastrophic overwash before AD 1800

***b*, Breach** cut by catastrophic overwash, occupied today by seasonal or perennial salt pond

**Sandy plain**—Extends westward from dashed white line and continues west of image area. The sand resembles that of the beach ridges, and it was probably derived from the breaches that were cut through them by catastrophic overwash.

**Brain coral** killed AD 1200-1450 (Fig. S6-5D)

WGS 1984 UTM zone 20Q. Rectified airphotos 2002



**Figure S3-1 Storm-water limits near Windlass Bight [continued from previous page]**

*C-E* **Topographic profiles** from shore to vicinity of highest wrack of Hurricane Earl

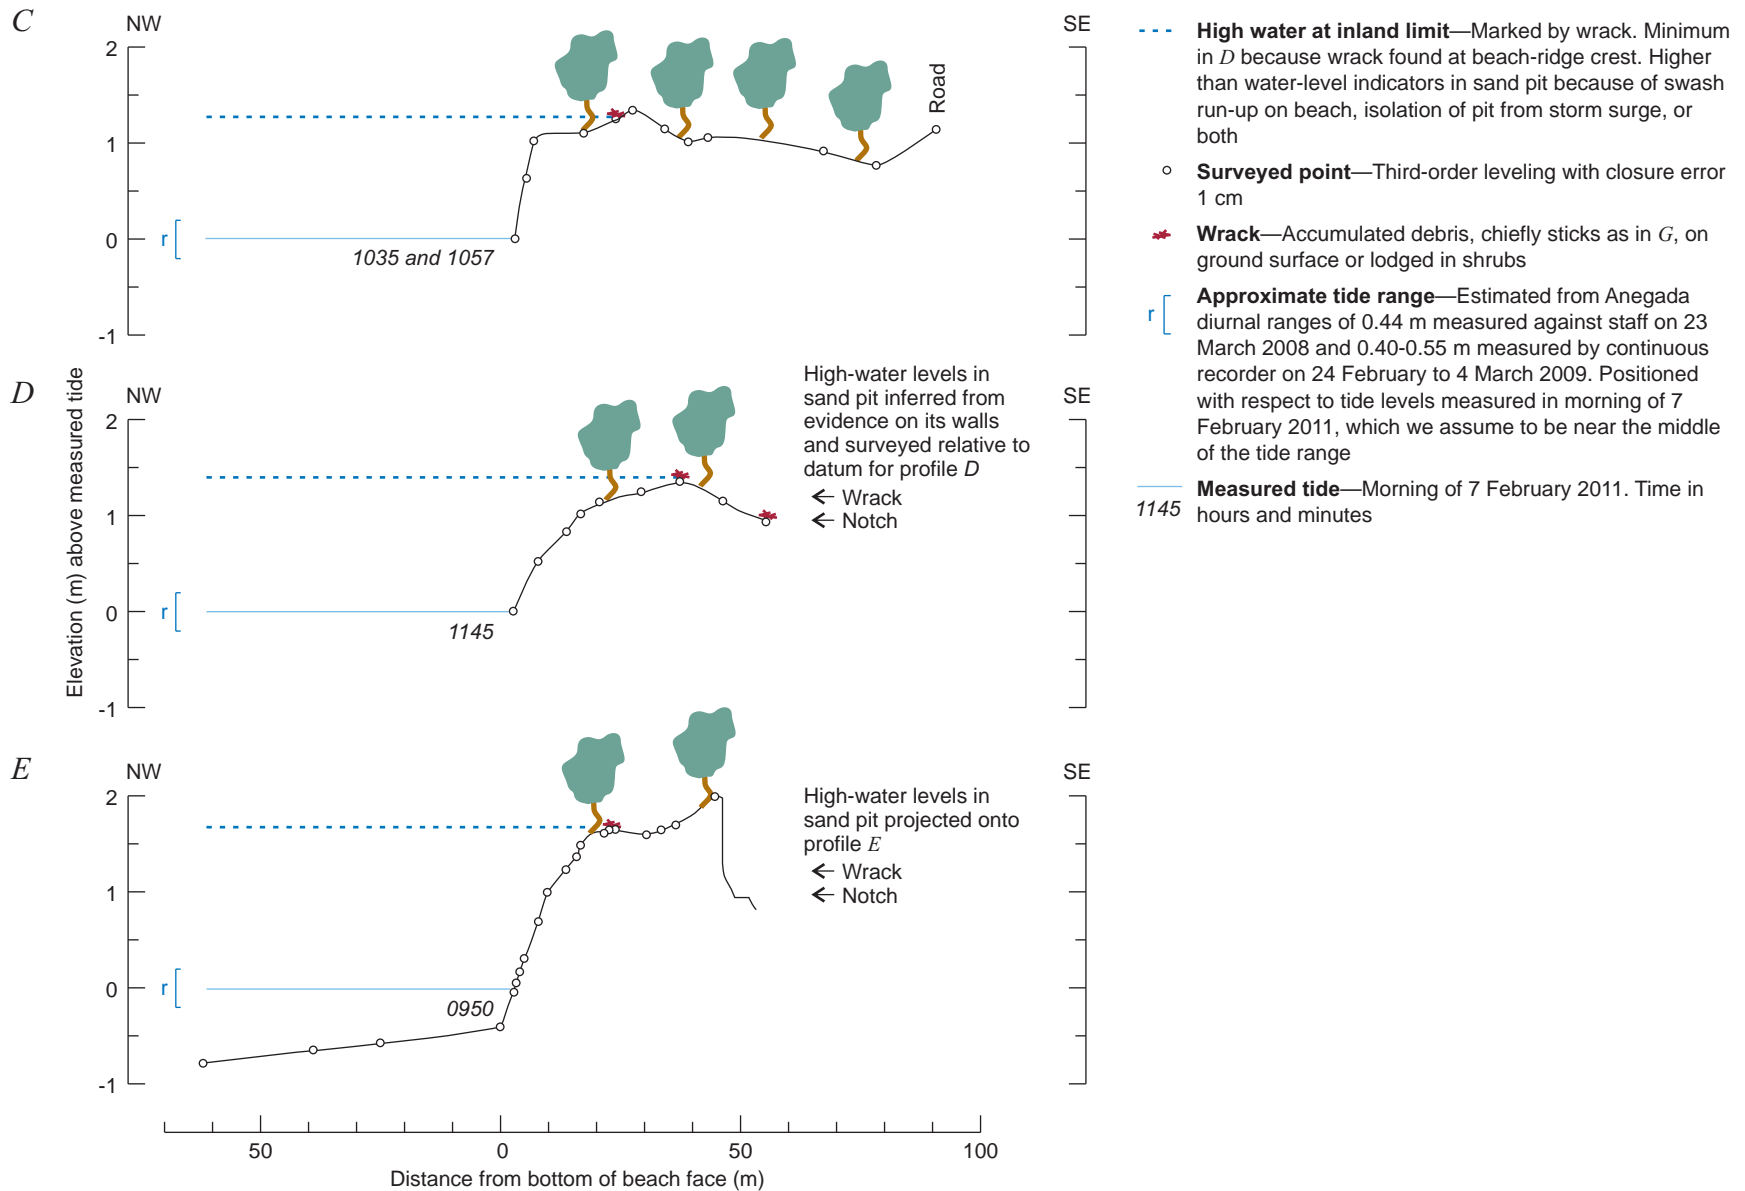

**Figure S3-2 Surge and wave limits west of The Settlement [page 1 of 2]**

*A* Surge and wave limits marked by wrack, and index map to topographic profiles. Oblique post-Hurricane views in Fig. S4-2 *A-C*

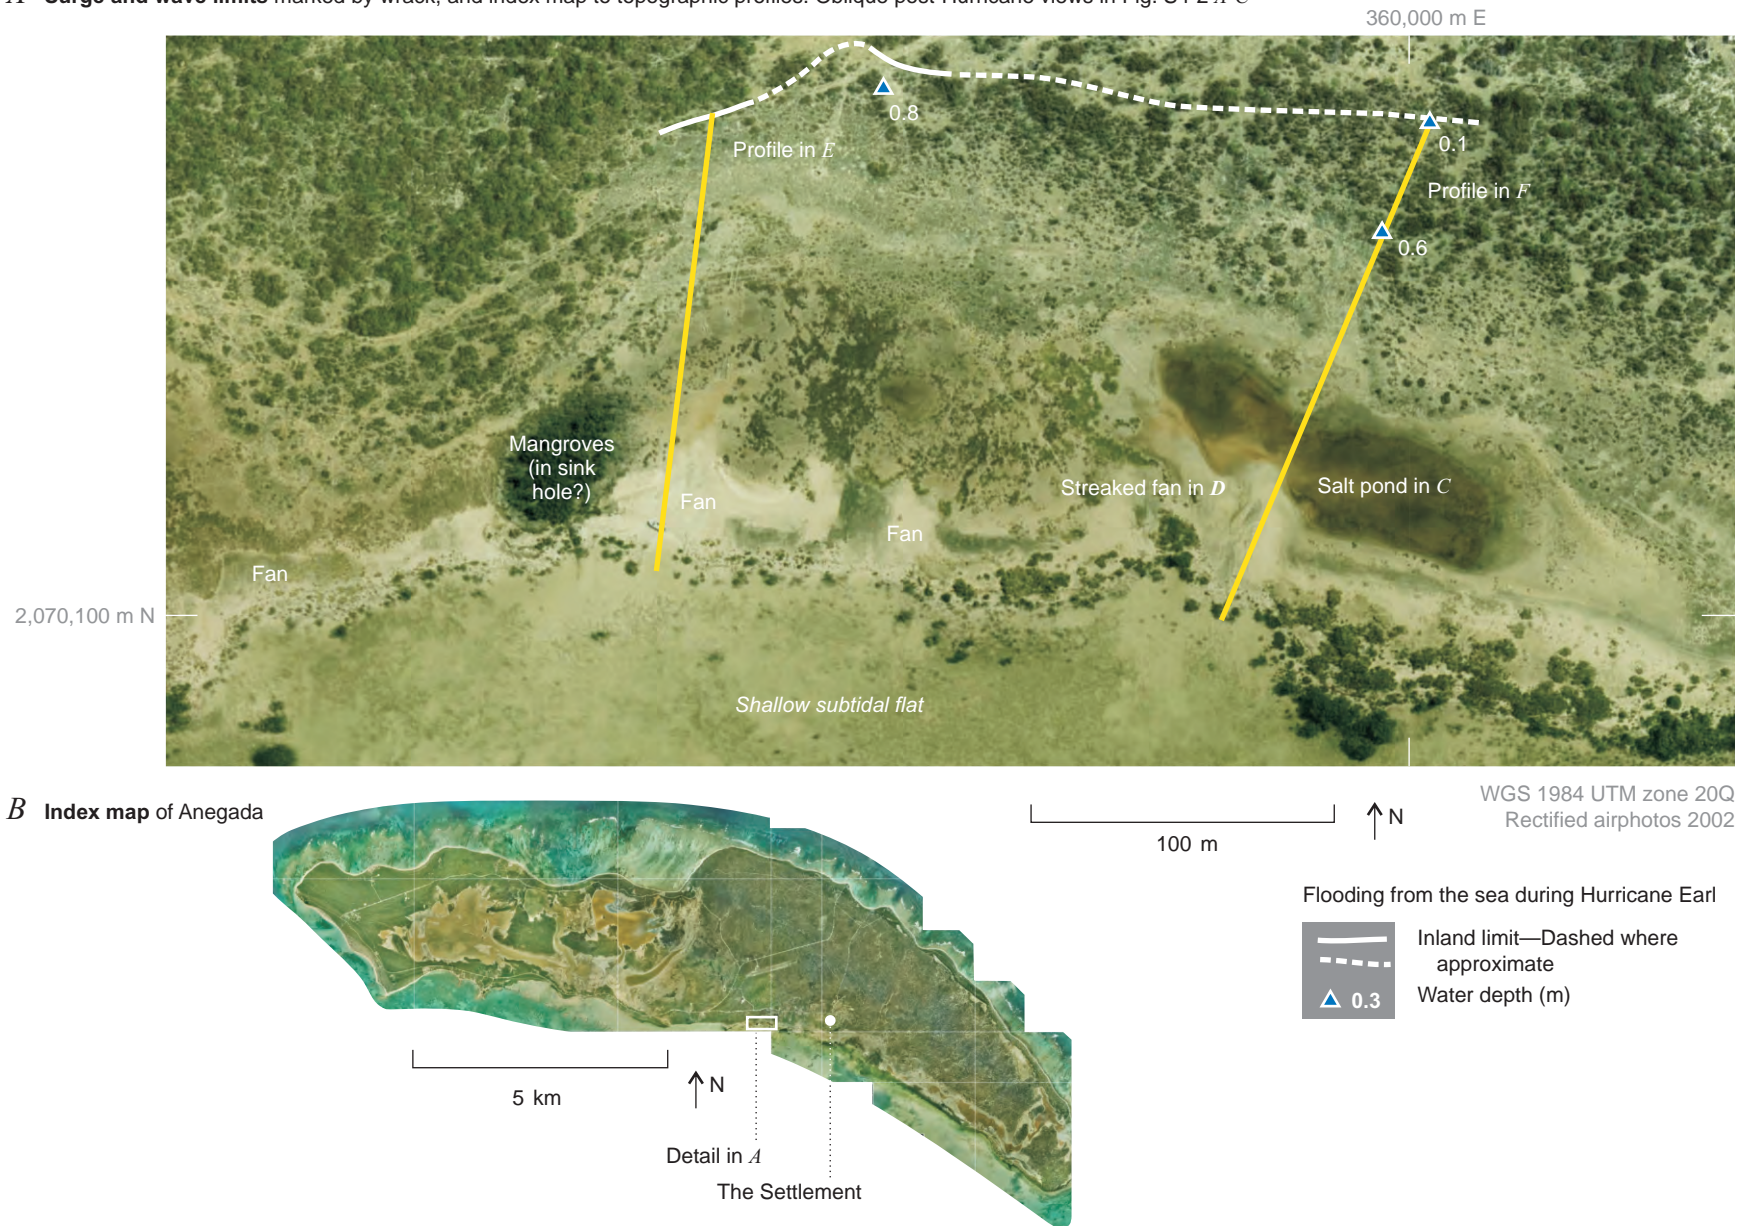



**Figure S3-2 Surge and wave limits west of The Settlement [page 2 of 2]**

*C,D* **Topographic profiles** from shore to vicinity of highest wrack of Hurricane Earl

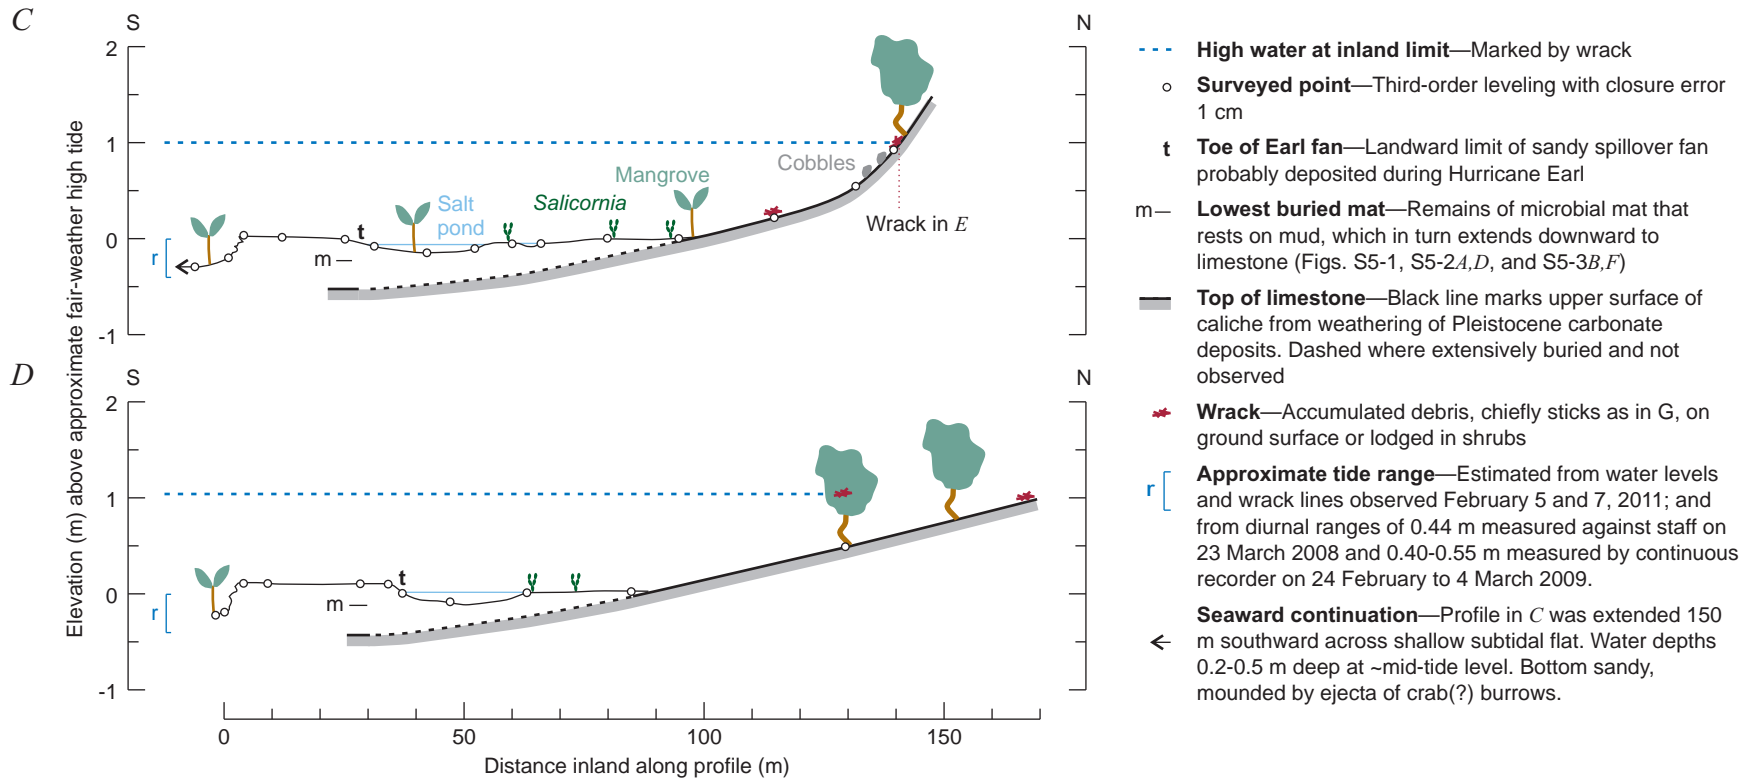

*E* **Wrack**, chiefly sticks, interpreted as marking limit of surge and waves of Hurricane Earl along profile in *C*. Stripes 0.1 m long

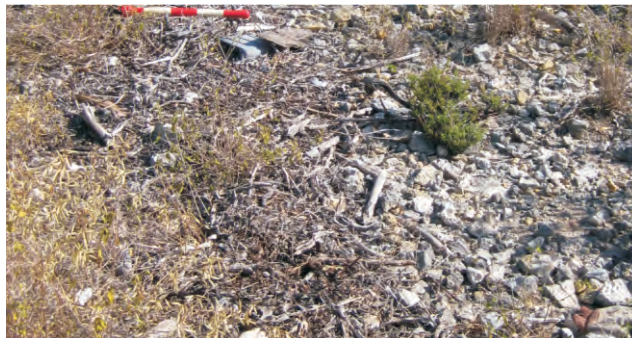

Wrack

**Figure S3-3 Storm-surge limits in The Settlement [page 1 of 2]**

**A 1960 Hurricane Donna**

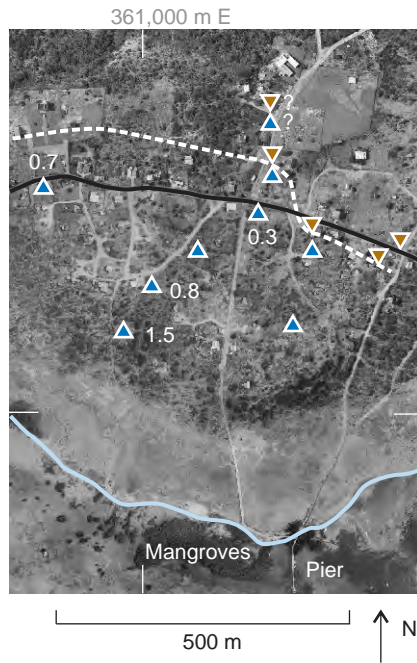

**B 2010 Hurricane Earl**

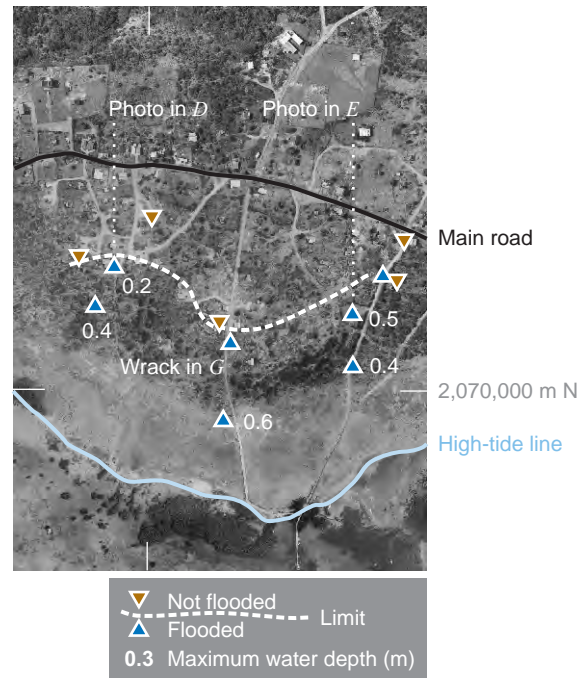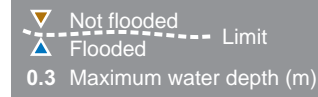

WGS 1984 UTM zone 20Q  
Rectified airphotos 2002

**C Index map of Anegada**

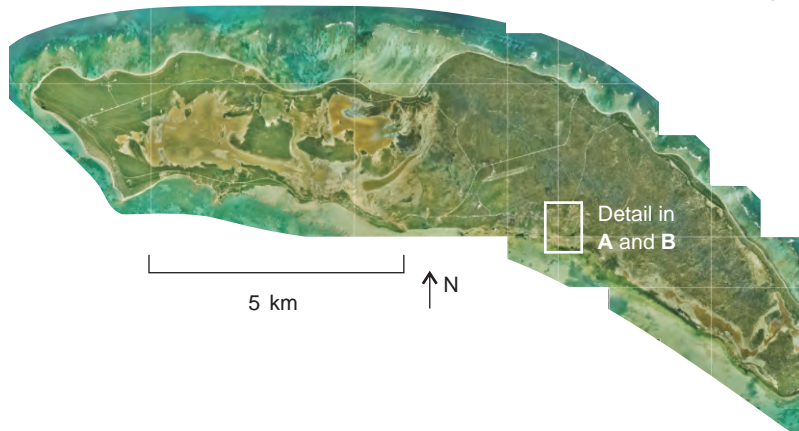

**D Earl and Donna limits reported by Julian Vanterpool**

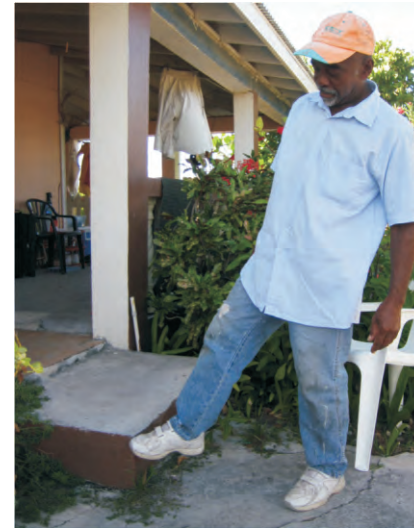

Mr. Vanterpool stated that Earl rose to the top of this step (depth labeled 0.2 in *B*), and that Donna was one foot deep at his former home (0.3 in *A*).

**E Earl limit reported by Allen Goeff**

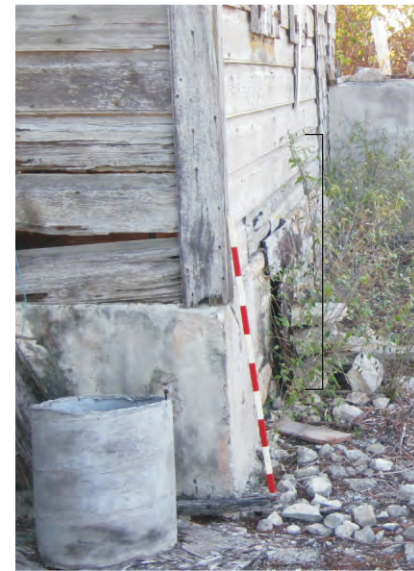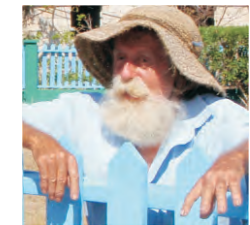

Mr. Goeff, also known as Spouge, stated that he was in this house during the hurricane, and that the water rose about two feet against it without flooding the floor. The ruler, marked in 0.1-m stripes, shows that the underlying foundation, rises 0.7 m above the ground.



**Figure S3-3 Storm-surge limits in The Settlement [page 2 of 2]**

*F* **Oblique aerial view** northward, morning of 31 August 2010 (about 20 hours after Earl's closest approach)

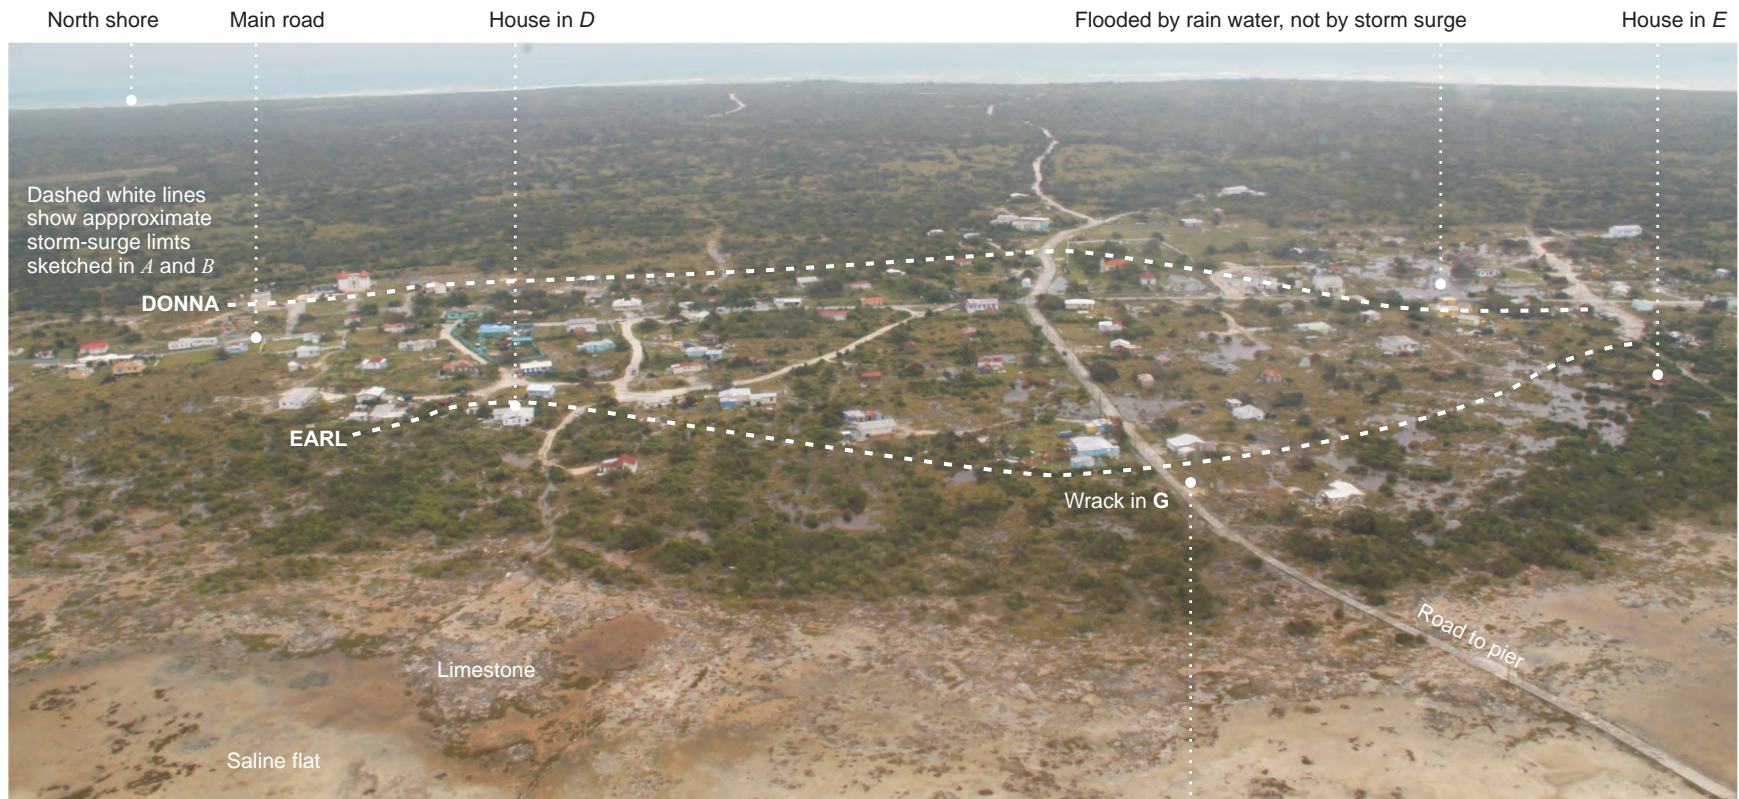

*G* **Most-inland of the Earl wrack** spotted along road to pier

10 cm

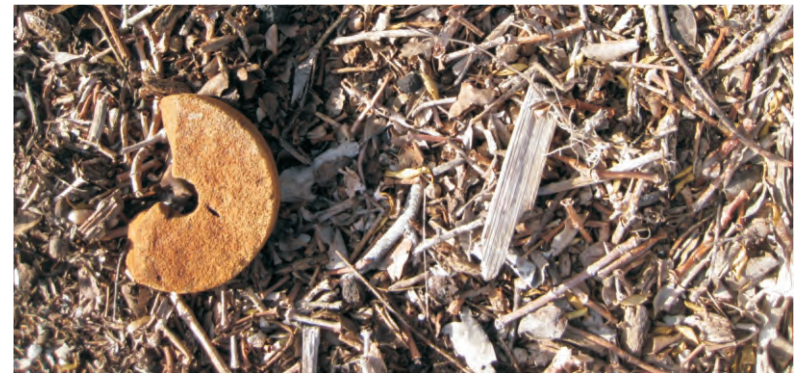



### Figure S3-4 Storm-surge limits east of The Settlement

*A* Oblique aerial view southeastward, morning of 31 August 2010 (about 20 hours after Earl's closest approach)

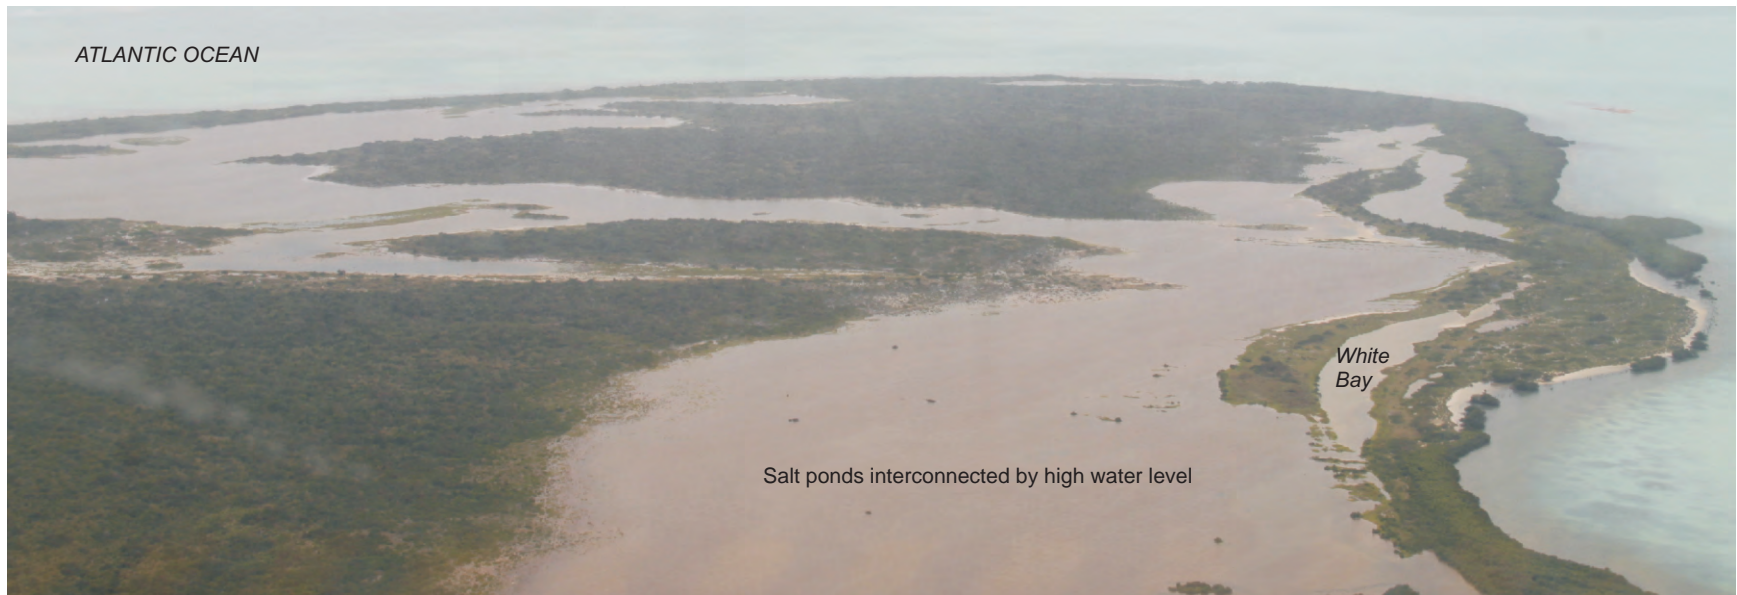

*B* Index map of Anegada

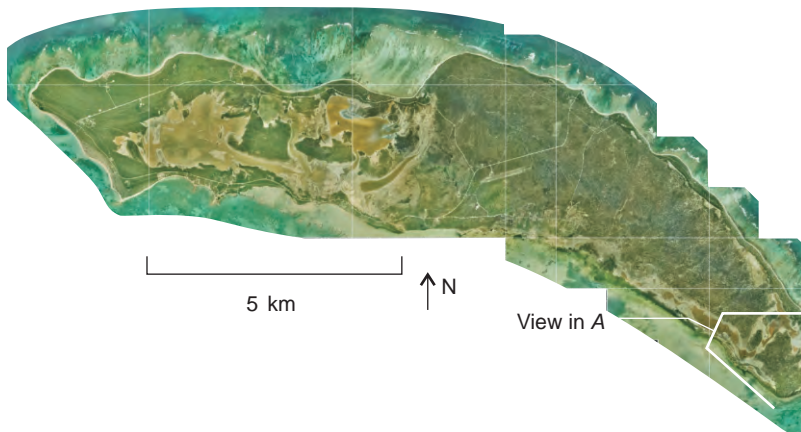

*C* Wrack of Hurricane Earl near White Bay. Shovel handle 0.5 m long

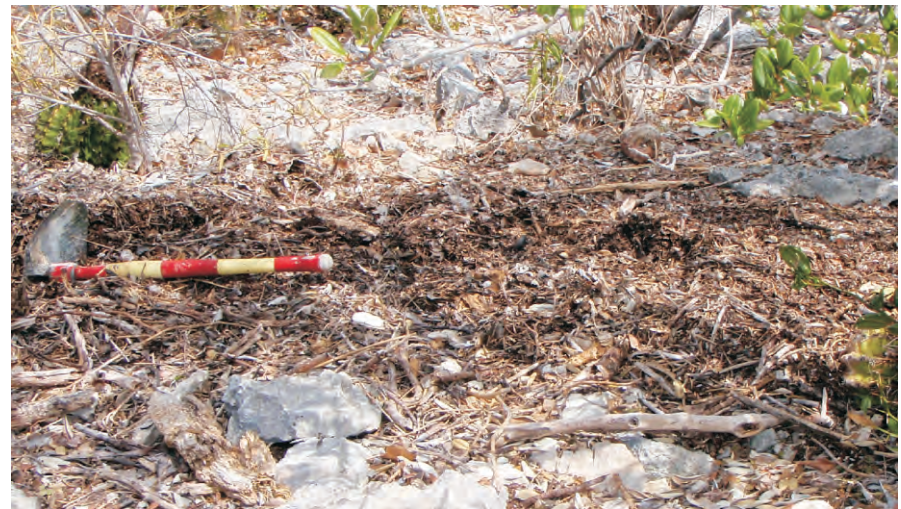



# Figure S4-1 Spillover fans near inlet to western salt ponds [page 1 of 3]

*A* Oblique airphoto taken morning of 31 August 2010 (about 20 hours after Earl's closest approach)

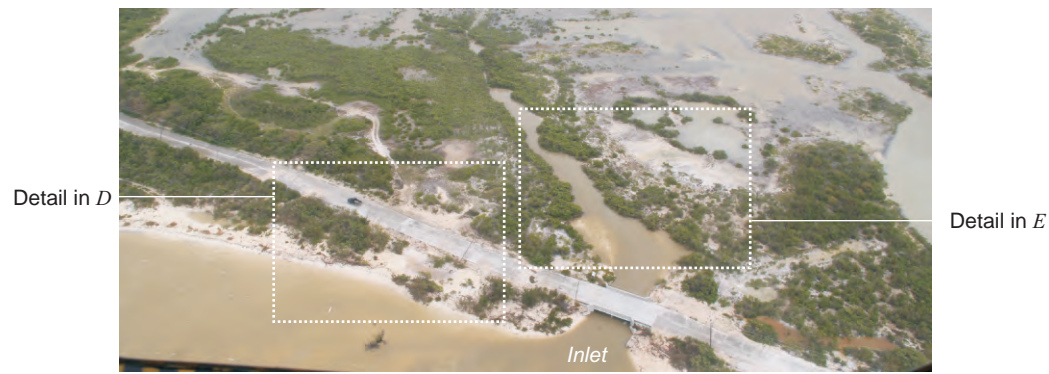

*B* Setting viewed vertically in 2002

2,070,800 m N

*C* Index map of Anegada

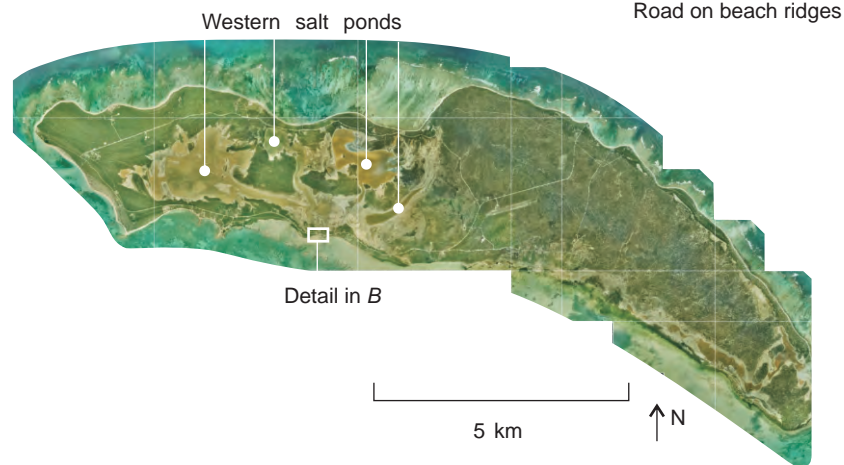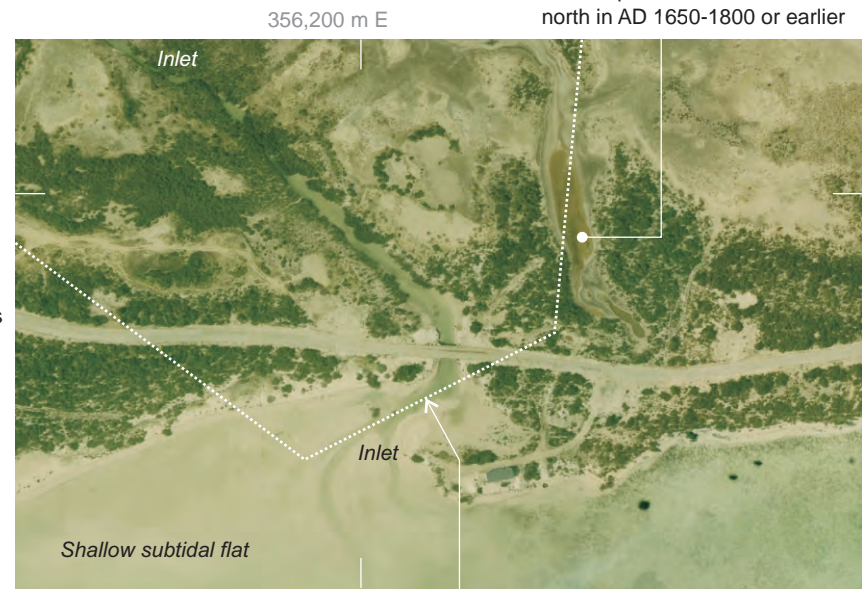

Former inlet, perhaps created or modified as outlet for catastrophic overwash from the north in AD 1650-1800 or earlier

## Figure S4-1 Spillover fans near the inlet to the western salt ponds [page 2 of 2]

*D,E* Oblique airphotos taken morning of 31 August 2010 (about 20 hours after Earl's closest approach). Location in *A*

*D* Sand west of bridge

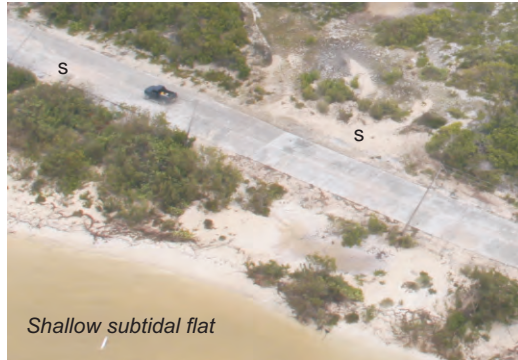

*E* Sand streaks on bank of inlet

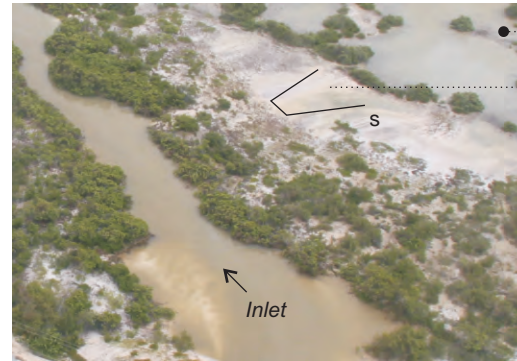

Still flooded the day after Earl but usually dry, as in *B*

View in *F*

The sand streaks suggest that storm surge from Hurricane Earl overflowed the inlet's right bank.

s, sand that appears freshly deposited

*F,G* Ground views of sand on bank of inlet, March 2011. Shovel handle 0.5 m

*F* Overview looking away from inlet. Location in *E*

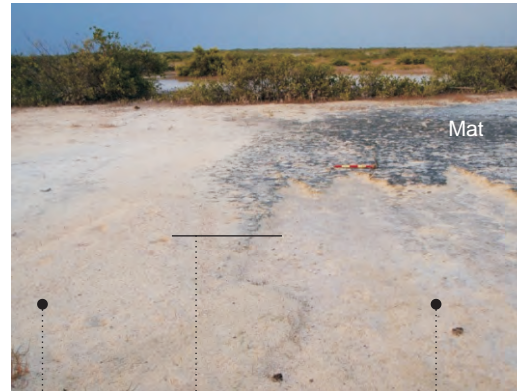

Fan of recently deposited sand and brown cerithid gastropod shells

Line of section in *G*

Microbial mat absent, apparently eroded before or during Hurricane Earl. Mat edge near shovel is scalloped inland as in scabland of Fig. S4-2*D*.

*G* Cross section through tapering fan deposits

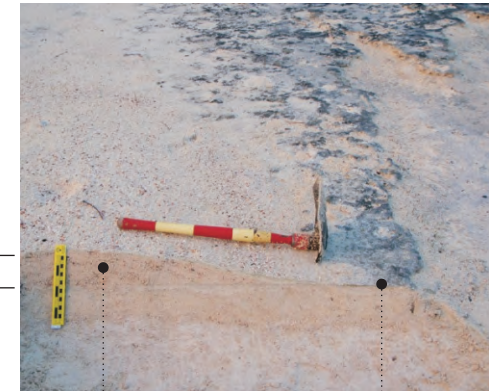

Fan deposits

Beds dip toward fan edge

Pre-Earl mat extends horizontally to left beneath fan deposits



## Figure S4-2 Spillover fans west of The Settlement [page 1 of 2]

*A-C* Oblique aerial views, southeastward (*A*) and northward (*B,C*), morning of 31 August 2010 (about 20 hours after Earl's closest approach)

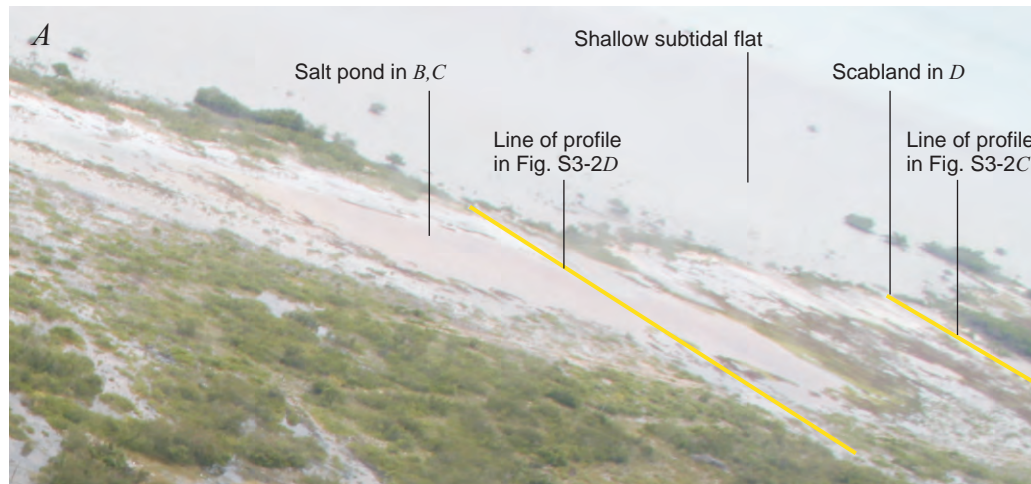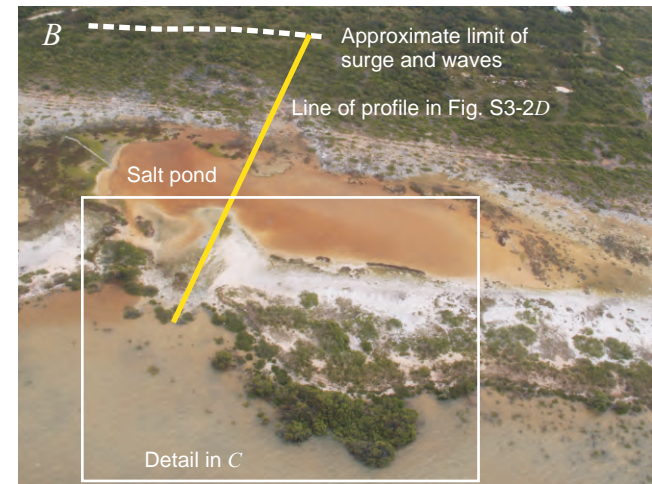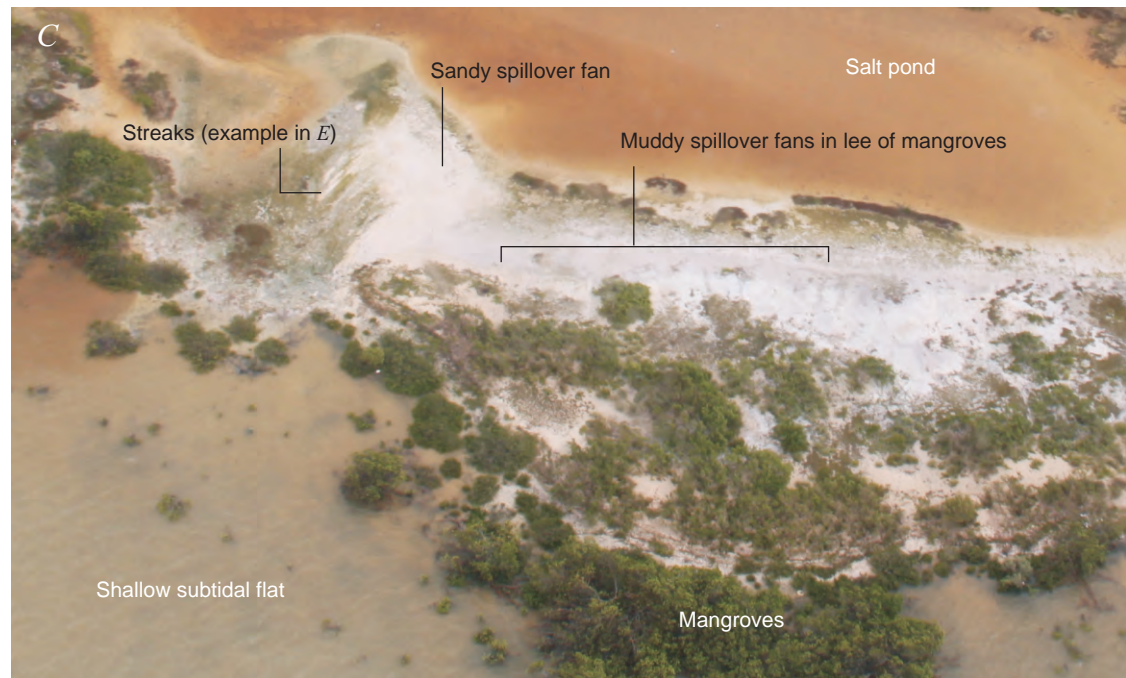

## Figure S4-2 Spillover fans west of The Settlement [page 2 of 2]

*D,E* Erosional landforms near shore, photographed 5 months after Hurricane Earl

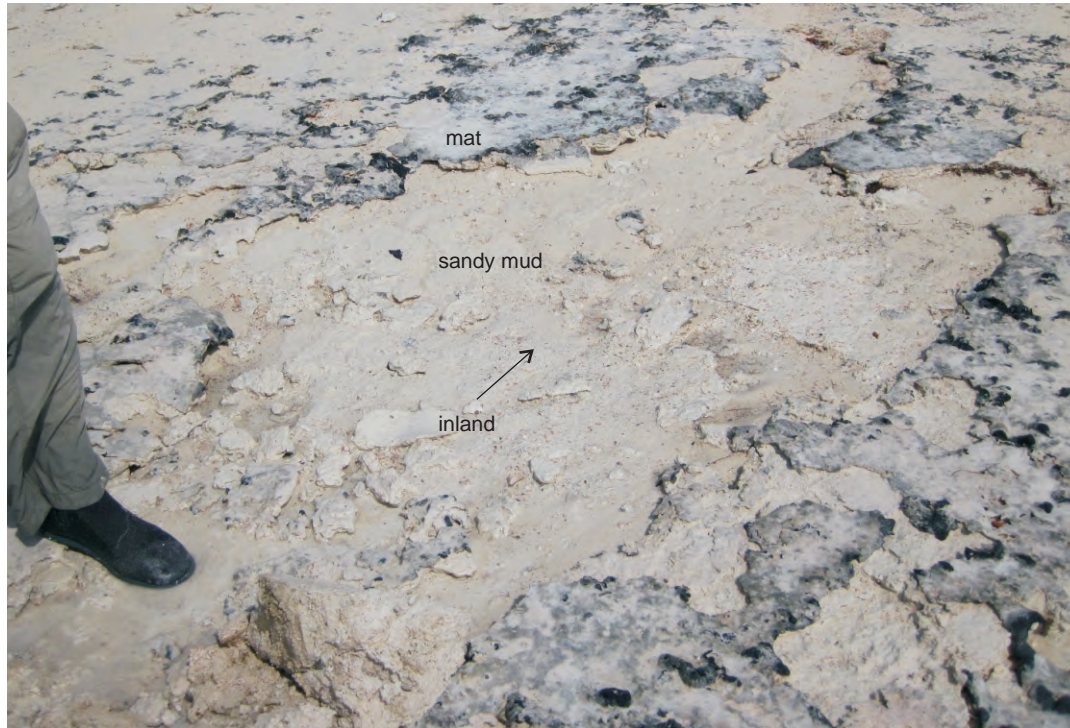

*D* **Scabland** seaward of fan, near south end of profile in Figure S3-2C. Patchy erosion of microbial mat has exposed the sandy mud that underlies it. Most of the mat has a thin, pale coating of lime mud. Foot for scale

*E* **Streak** in gray microbial mat on sandy spillover fan. The streak is made of sand, and the sand occupies a gap in the mat. Elsewhere on the fan this mat is mantled by sand that was probably deposited during Hurricane Earl. Shovel handle 0.5 m long

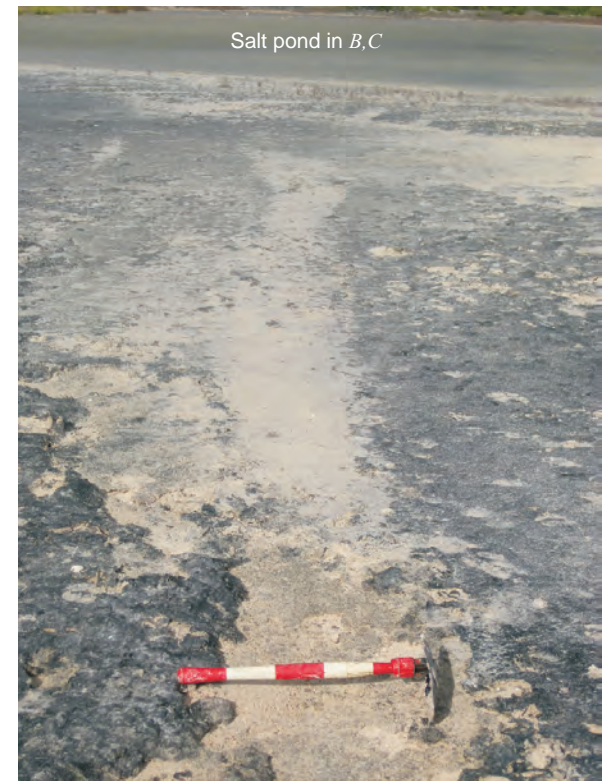



**Figure S5-1 Overview of sandy fan stratigraphy west of The Settlement**

*A,B* Setting of stratigraphic sections along topographic profiles in *E* (profiles simplified from Fig. S3-2)

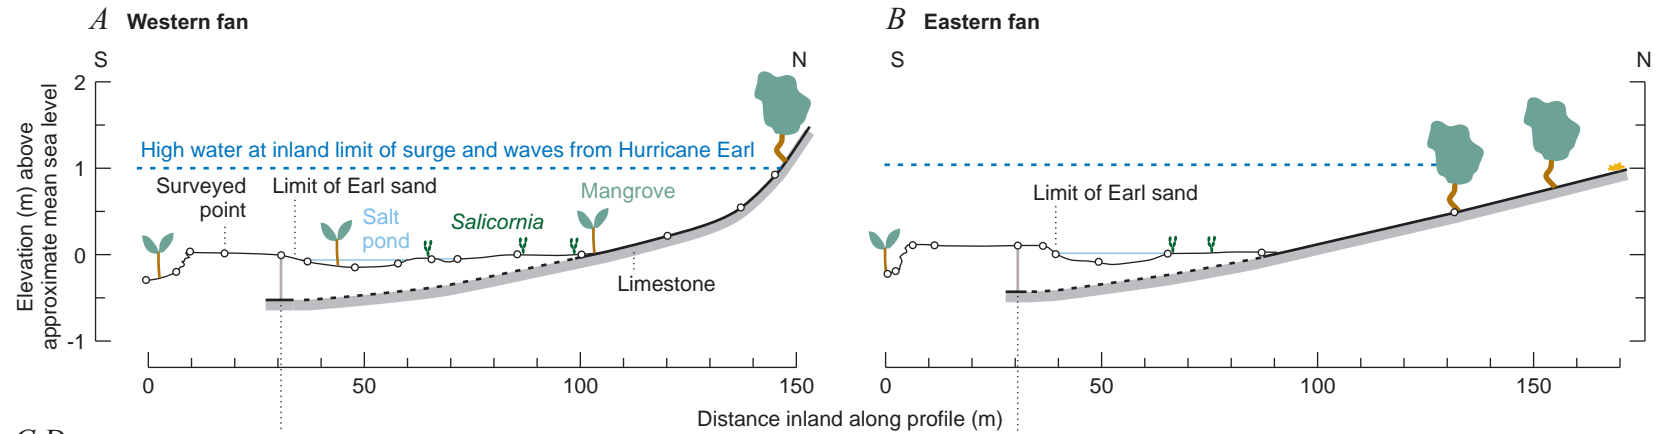

*C,D* Stratigraphic sections and radiocarbon ages

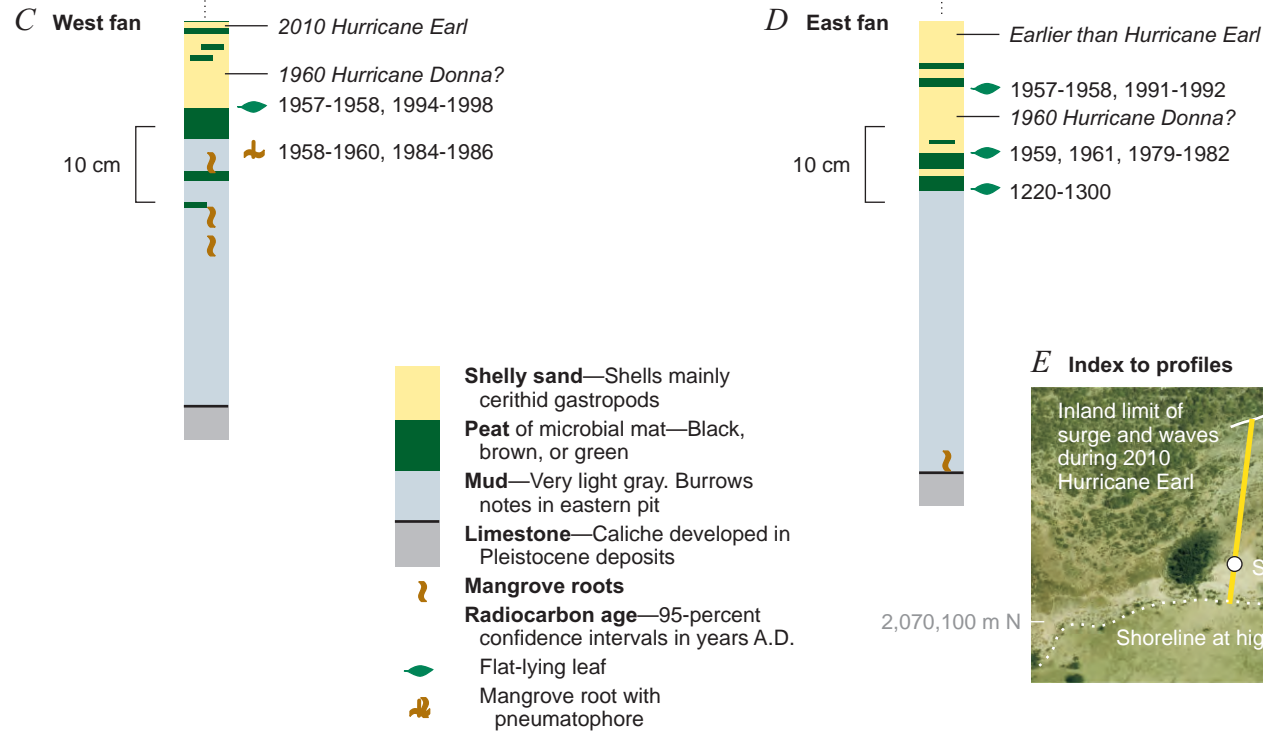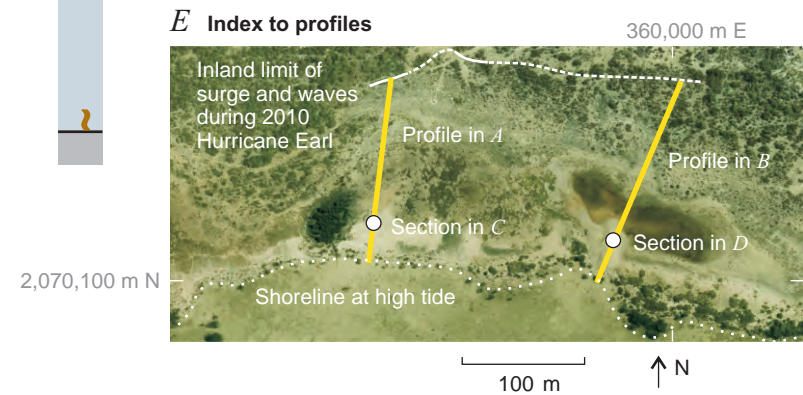

## Figure S5-2 Deposits of western fan [page 1 of 3]

*A* View northwestward across trench and pit on profile in Figs. S3-24, *C* and S4-24

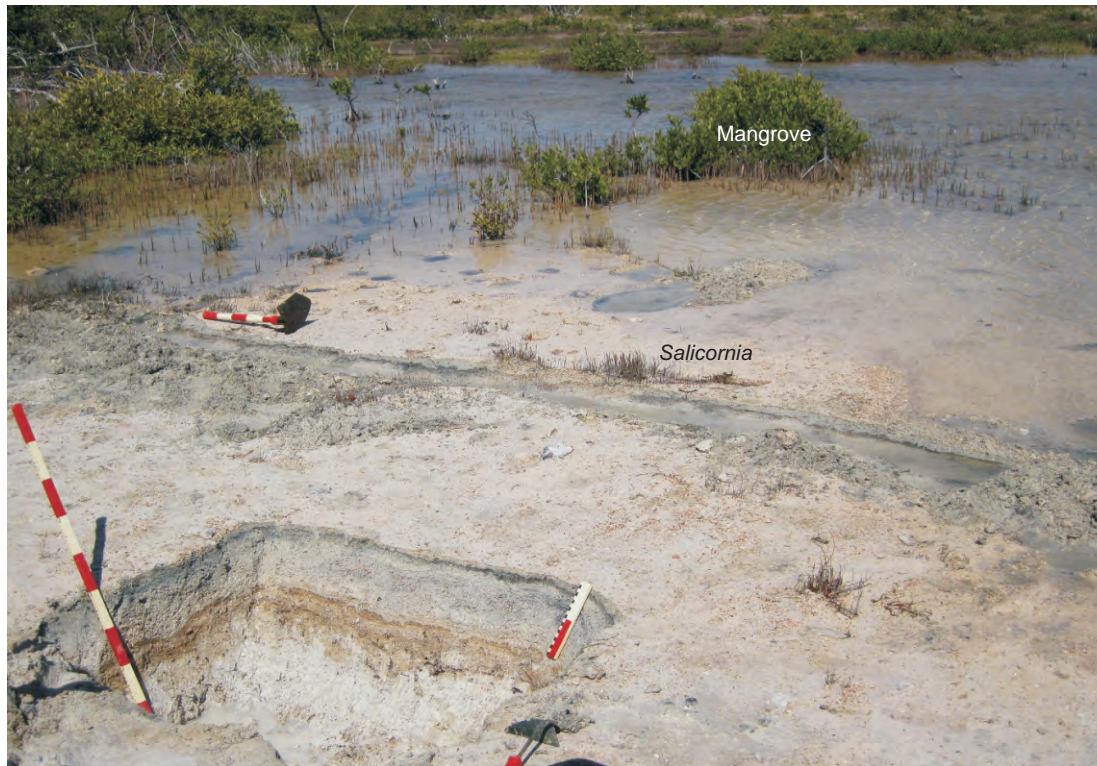

Approximate landward limit of sand deposited by Hurricane Earl

Trench in *B, C*

Stripes on shovel and rulers 0.1 m long

Pit in *D-F*, 20 m inland from shore

↗ Inland, and approximately northward, along profile



**Figure S5-2 Deposits of western fan** [page 2 of 3]

*B* Trench in *A*

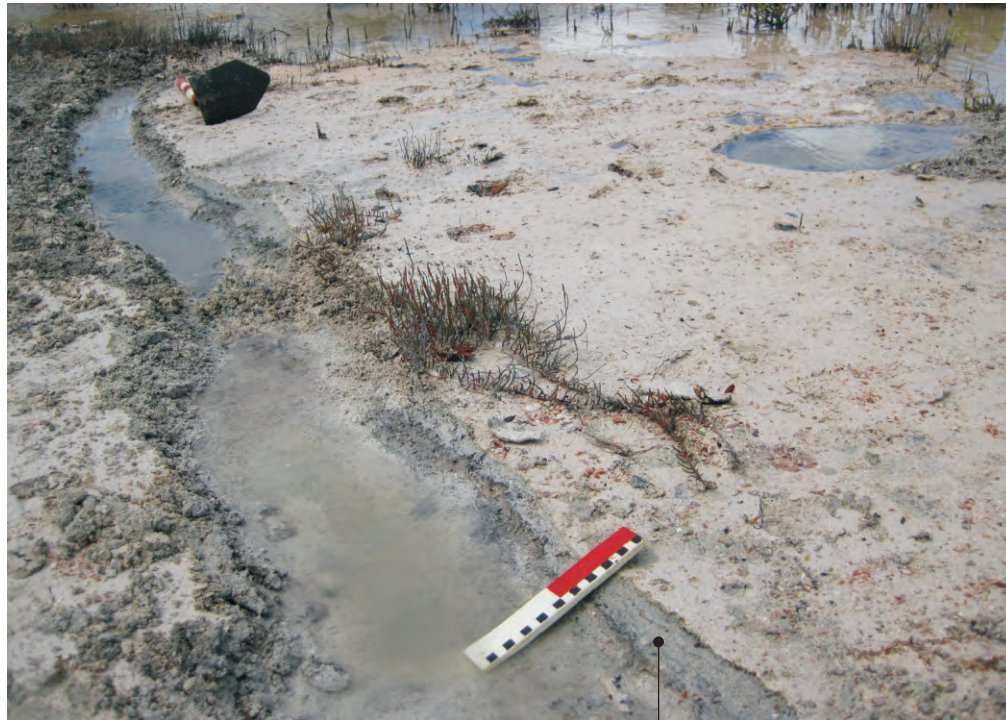

↗  
Inland along profile

Detail in *C*      Pre-Earl mat

*C* Detail of sand ascribed to Hurricane Earl

Squares 1 cm  
Ruler at low angle

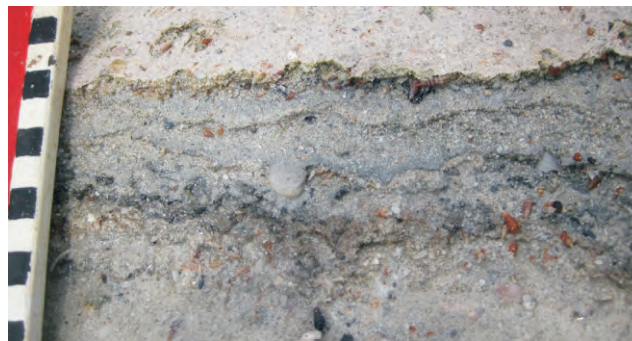

Incipient post-Earl mat

Very fine sand

Very fine sand

Pre-Earl mat

**Sand ascribed to Hurricane Earl**  
True thickness 2 cm

**Figure S5-2 Deposits of western fan** [page 3 of 3]

**D-F Stratigraphy and chronology of pit in A**

**D North wall**

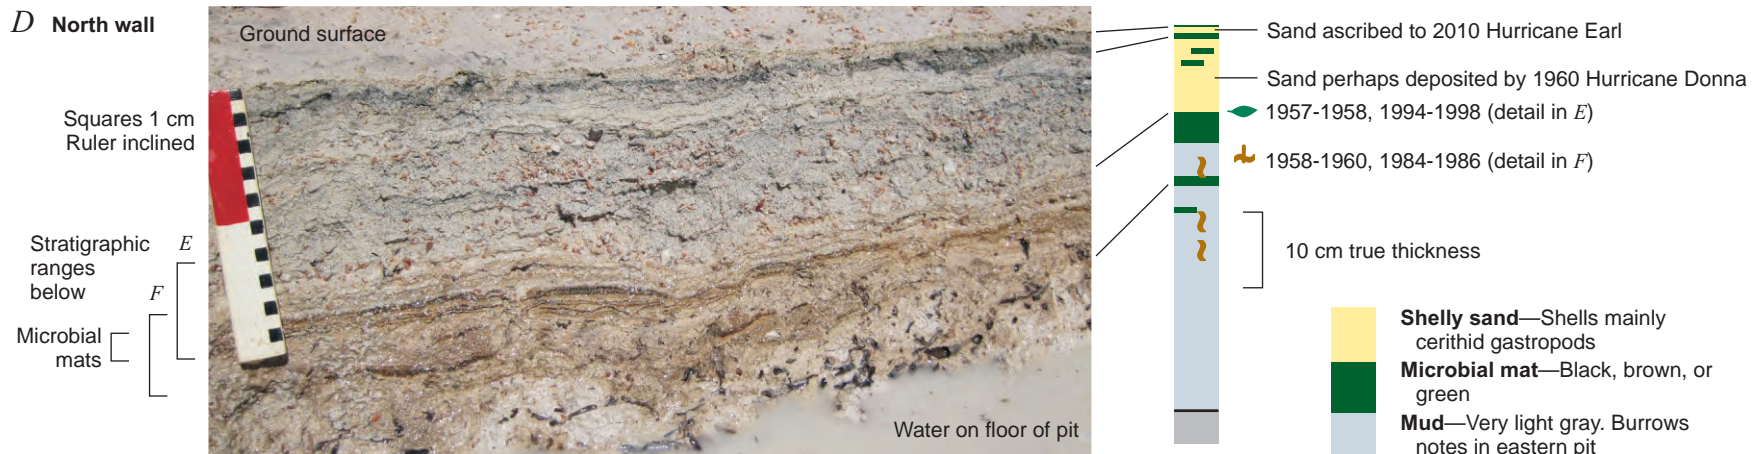

**E Dated leaf above black mats**

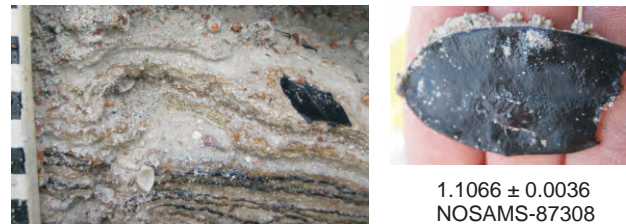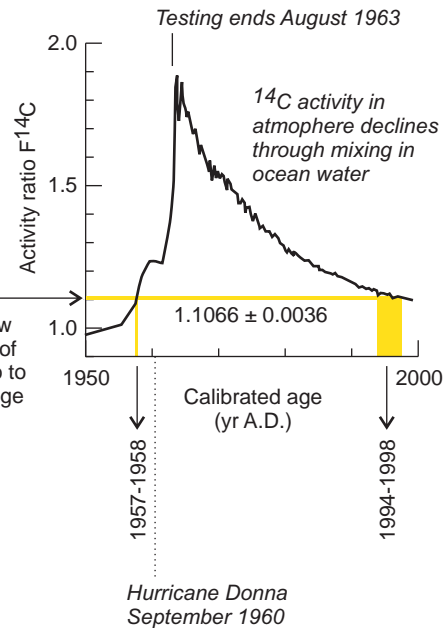

**F Dated root below black mats**

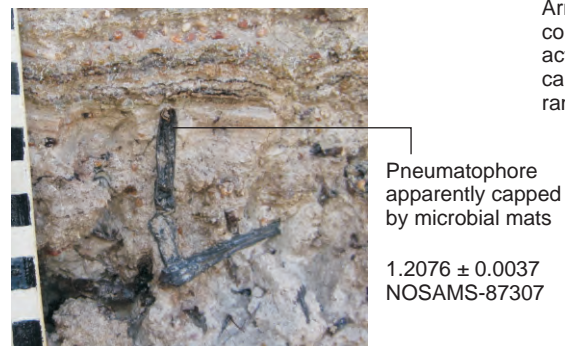

1957-1958, 1994-1998

**Radiocarbon age**

Calibrated ranges at two standard deviations in yr A.D.

**Materials dated**

Flat-lying leaf

Mangrove root with pneumatophore

1.1066 ± 0.0036

**Activity ratio**  $F^{14}C$ —Ratio of sample to oxalic-acid standard

NOSAMS-87308

**Lab number**

Calibrated ranges computed from activity ratio as in *E*. Ratios exceed 1.0 because atmospheric testing of nuclear weapons in the 1950s and early 1960s enriched the atmosphere in radiocarbon.

**Calibration data** is zonal average compiled by Hua and Barbetti (2004) for the northern hemisphere between latitude 40° and the mean summer intertropical convergence zone (NH\_zone2.14c dataset). The average uses measurements of the atmosphere and organic material, including tree rings. Local and seasonal values may deviate from the zonal average.

**Calibration program** CALIBomb of P.J. Reimer and R. Reimer (<http://calib.qub.ac.uk/CALIBomb/frameset.html>)

**Activity ratio**  $F^{14}C$  defined by Reimer and others (2004)



## Figure S5-3 Deposits of eastern fan [page 1 of 3]

*A, B* **Overviews** looking northward

*A* **Fan** of Fig. S4-2C,E

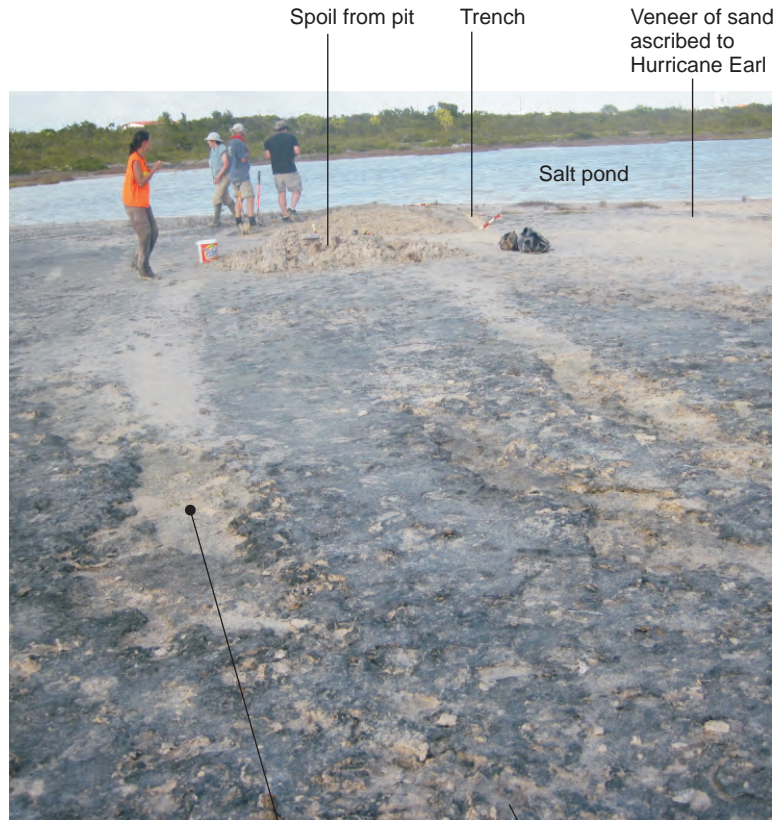

Mat missing along streak in Fig. S4-2E, apparently eroded during Hurricane Earl

Mat at surface at time of Hurricane Earl

*B* **Toe of fan** with trench (detail in C-E) and pit (detail in F,G)

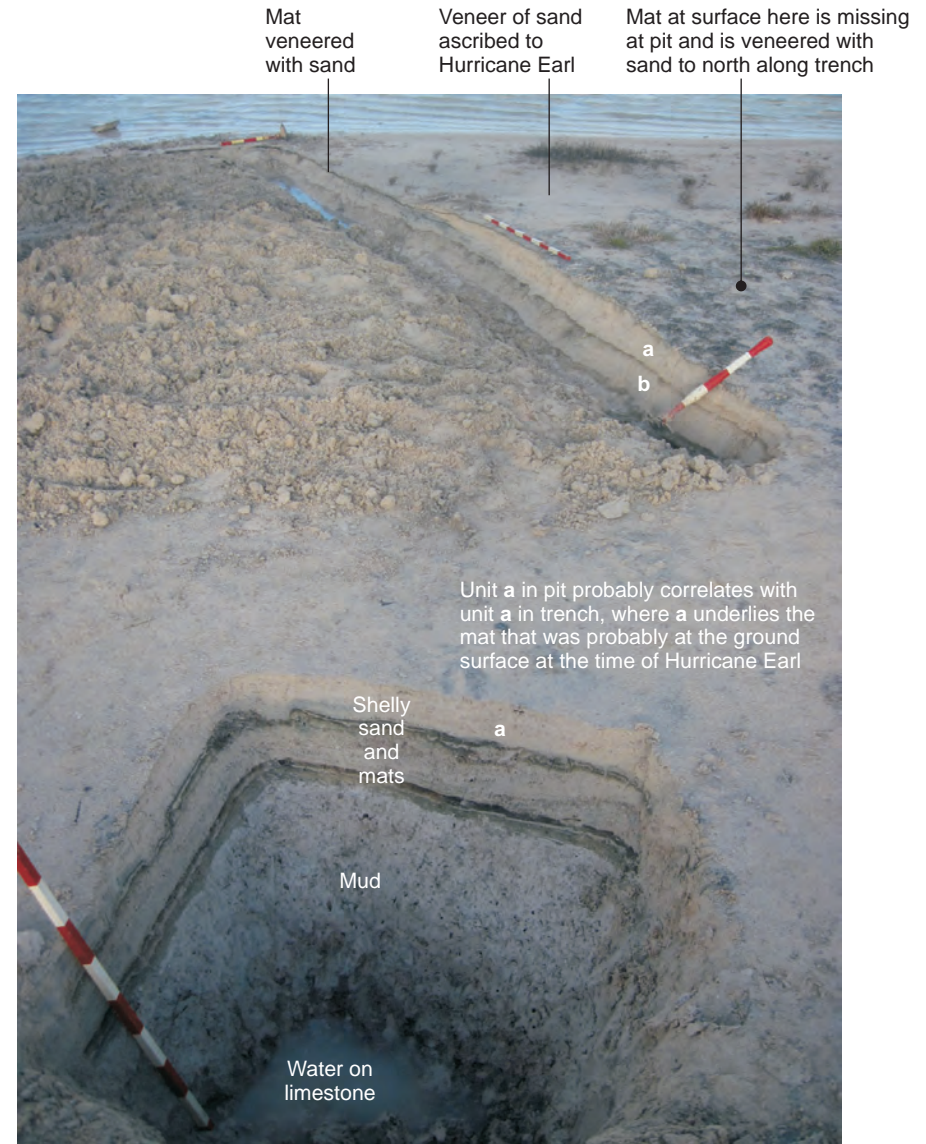



## Figure S5-3 Deposits of eastern fan [page 2 of 3]

*C* Trench in *B* viewed northward

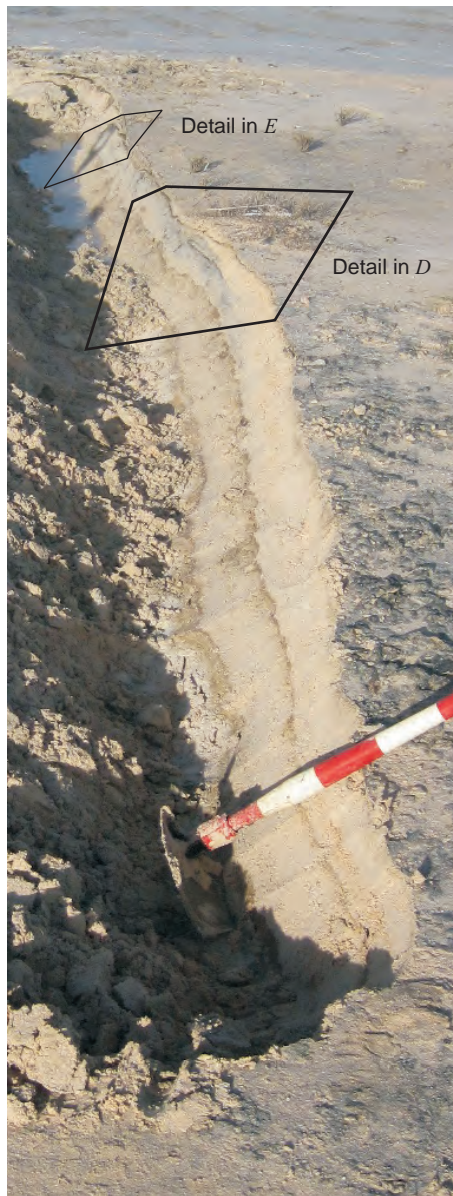

*D,E* East wall of trench viewed southeastward

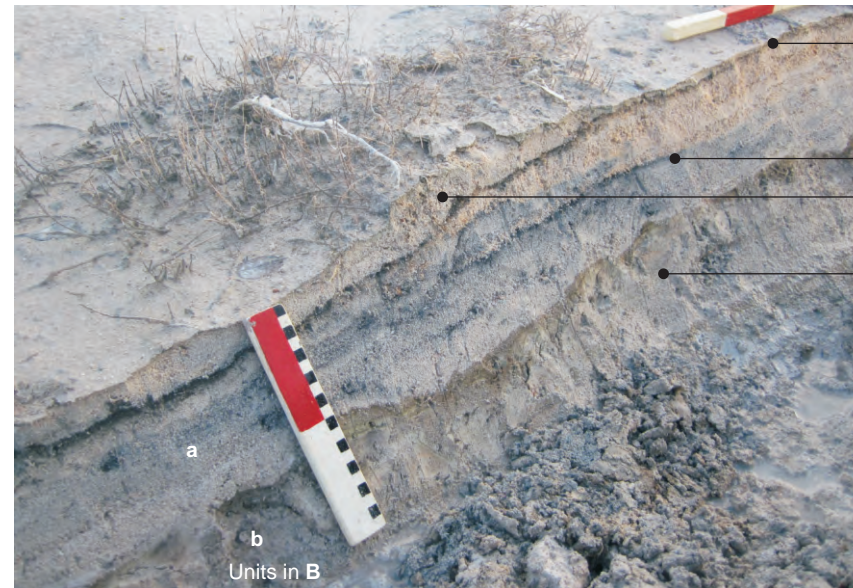

- Mat veneered with sand ascribed to Hurricane Earl
- Erosional remnant of earlier mat
- Sand veneer thickens in and near *Salicornia* clump
- Sandy unit **b** in *B*, underlain by mat along southern part of trench

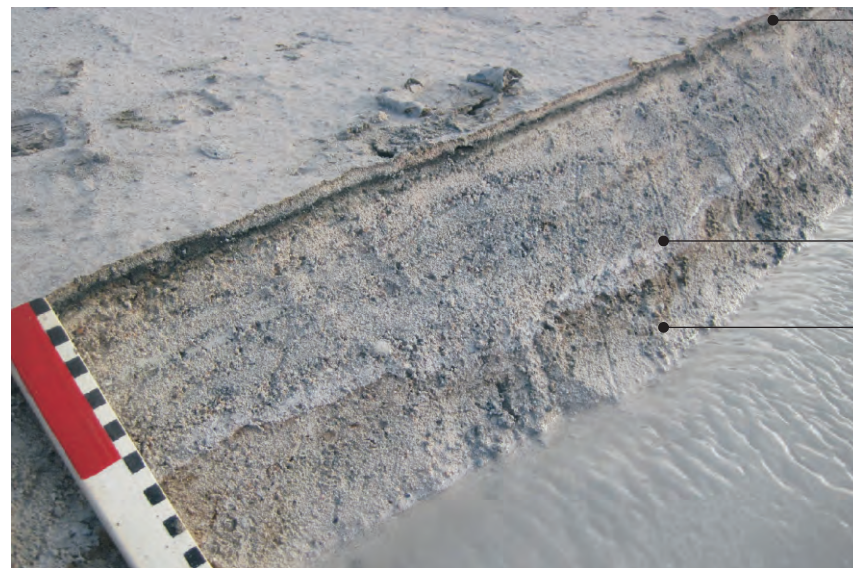

- Mat veneered with sand ascribed to Hurricane Earl
- Lime mud low in shelly sand
- Sandy unit **b** in *B*, underlain by mat along southern part of trench
- Stripes on shovel handle and ruler are 10 cm long



## Figure S5-3 Deposits of eastern fan [page 3 of 3]

*F* Pit in *B* viewed northward

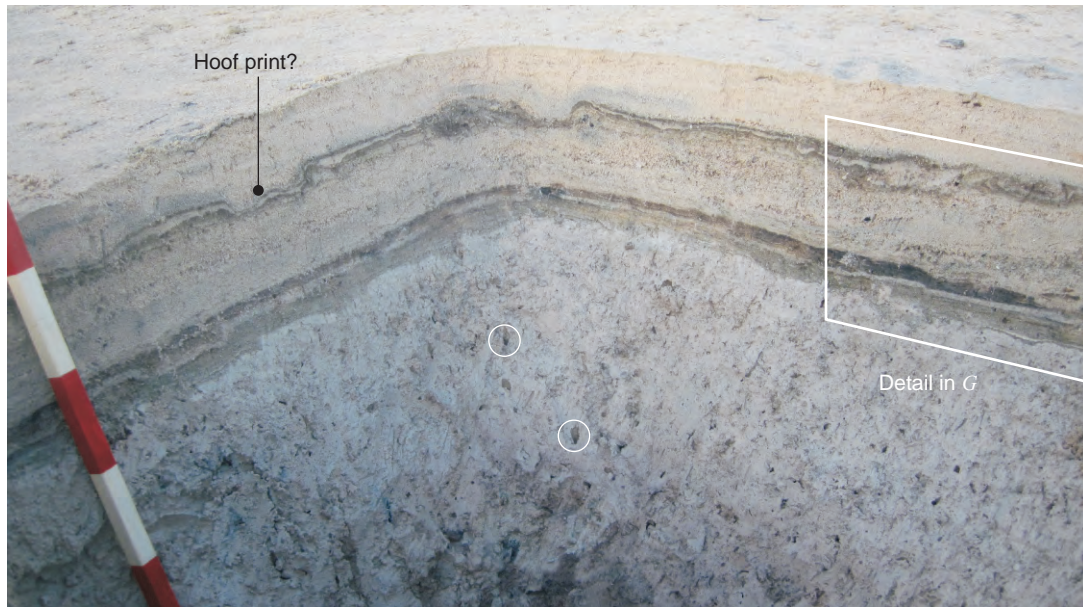

Sand earlier than 2010 Hurricane Earl (as judged from likely position beneath mat in *B*) but probably later than 1960 Hurricane Donna (if Donna deposited the landward-dipping sand beds in *E*)

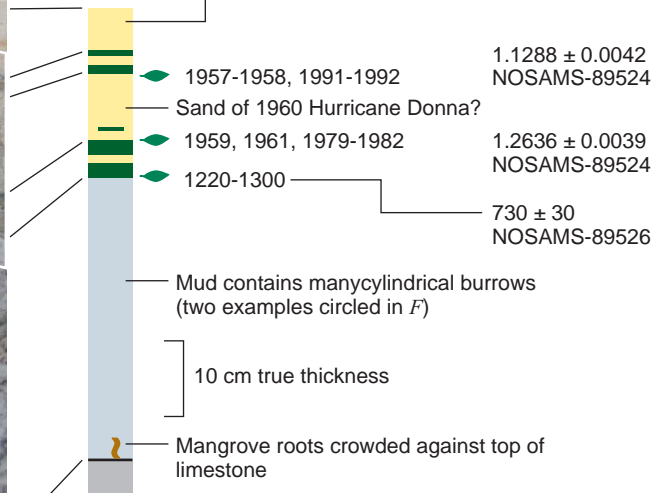

*G* Landward-dipping beds between mat pairs

Fine sand

10 cm

Fine sand

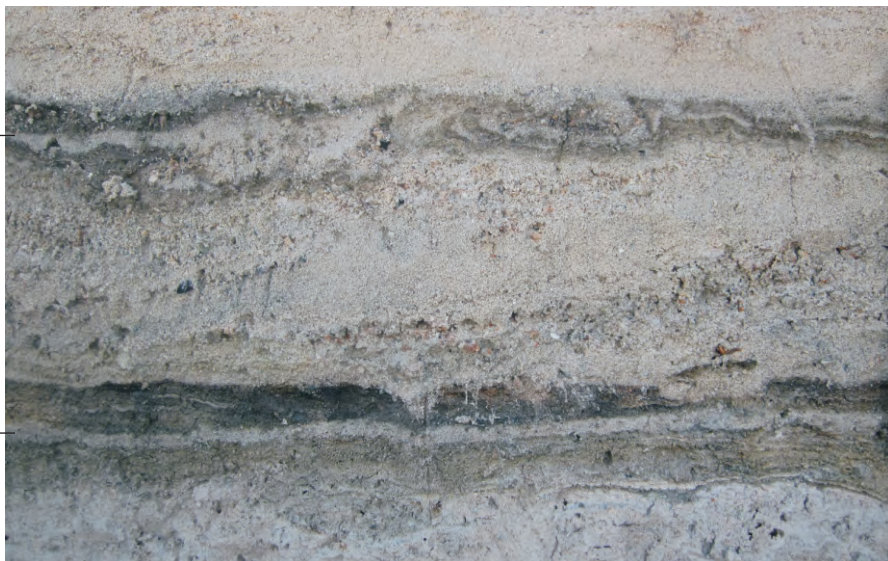

**Shelly sand**—Shells mainly cerithid gastropods  
**Microbial mat**—Black, brown, or green  
**Mud**—Very light gray. Burrows notes in eastern pit  
**Limestone**—Caliche developed in Pleistocene deposits  
**Mangrove roots**

**Radiocarbon age**  
 1957-1958, 1991-1992 **Calibrated ranges** at two standard deviations in yr A.D.  
 1.1288 ± 0.0042 **Material dated**—Flat-lying leaf  
 730 ± 30 **Activity ratio**  $F^{14}C$ —Ratio of sample to oxalic-acid standard  
 NOSAMS-89524 **Conventional age** in 14C yr B.P.  
**Lab number**

Calibration of bomb carbon illustrated in Figure S5-2D-F

**Figure S6-1 Comparisons** between evidence for catastrophic overwash and effects of 2010 Hurricane Earl

**A Geologic setting** (broader context in Fig. S1-24)

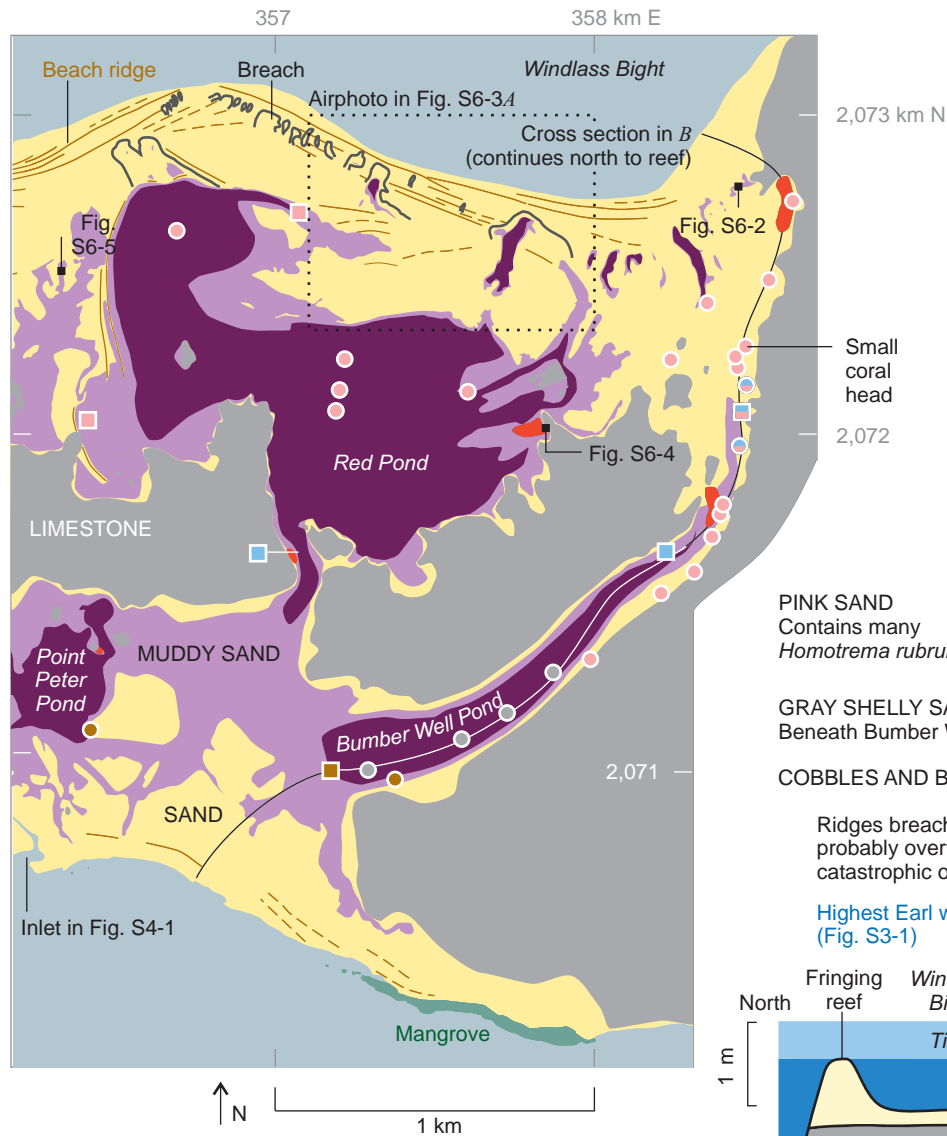

**DEPOSITS ASCRIBED TO CATASTROPHIC OVERWASH**

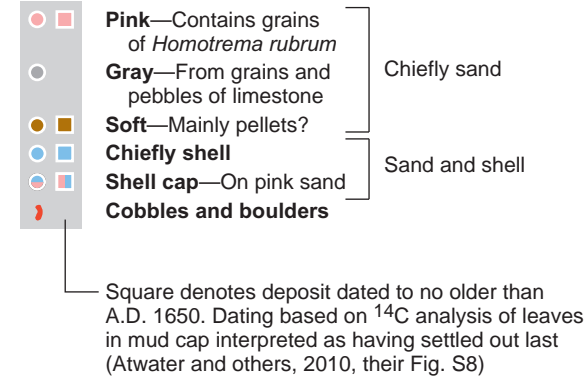

**B Cross section** through evidence for catastrophic overwash

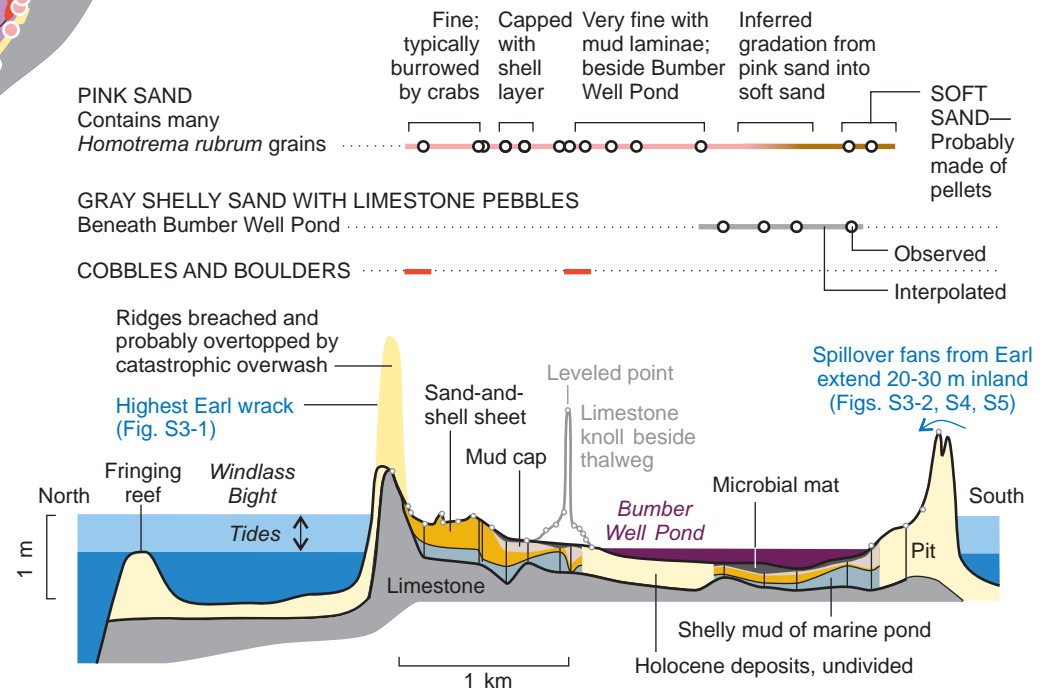



## Figure S6-2 Microbial detritus in breach north of Bumber Well Pond

**A** Microbial detritus, with *in situ* microbial coating, ranging from soft and continuous at wet center of pond to firm and chunky on desiccated fringe

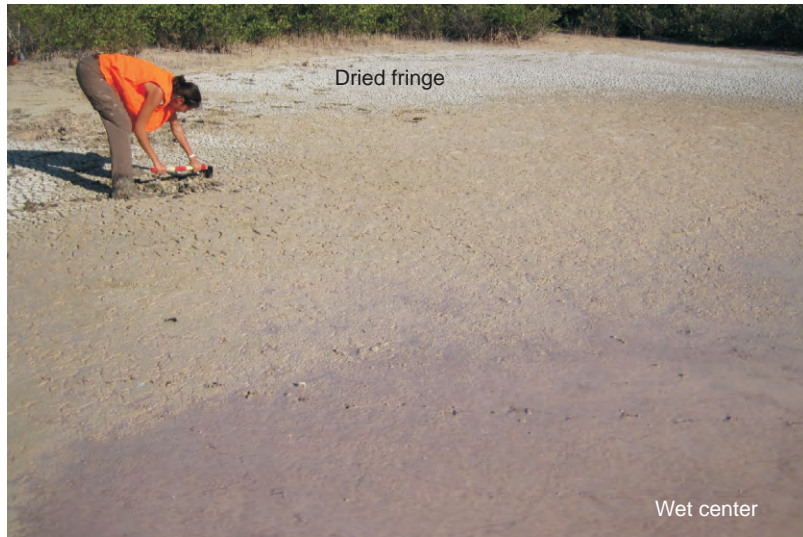

**B** Dried microbial detritus shrunken into chunks on pond fringe

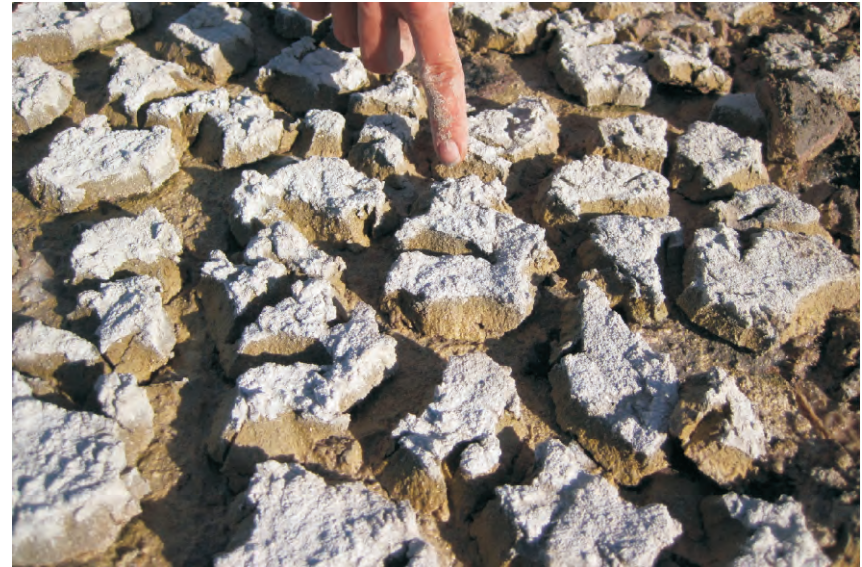

**C** Stratigraphy logged in 2009

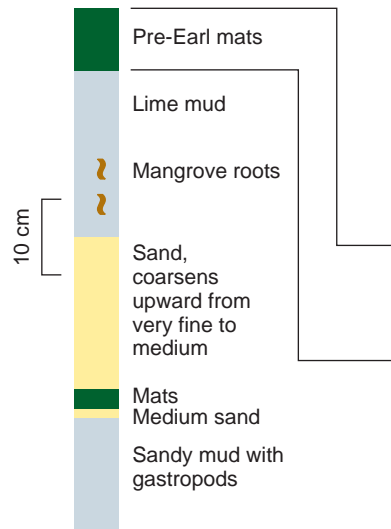

**D** Soft gray microbial detritus above pre-Earl mats of pond center

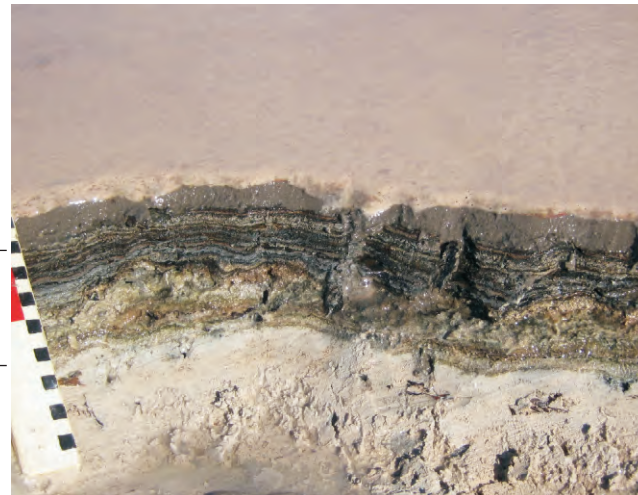

Scale oblique, squares 1 cm

**E** Detail of deposits in D

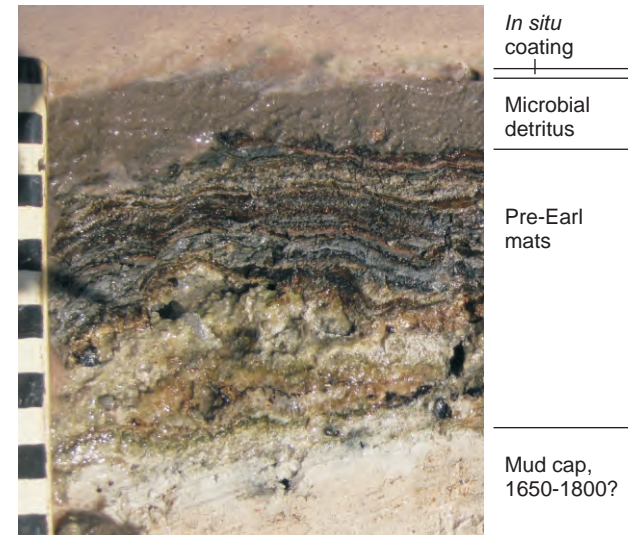



**Figure S6-3 Microbial detritus and boulder juxtaposed in breach north of Red Pond [page 1 of 4]**

**A Overview of breaches in beach ridges**

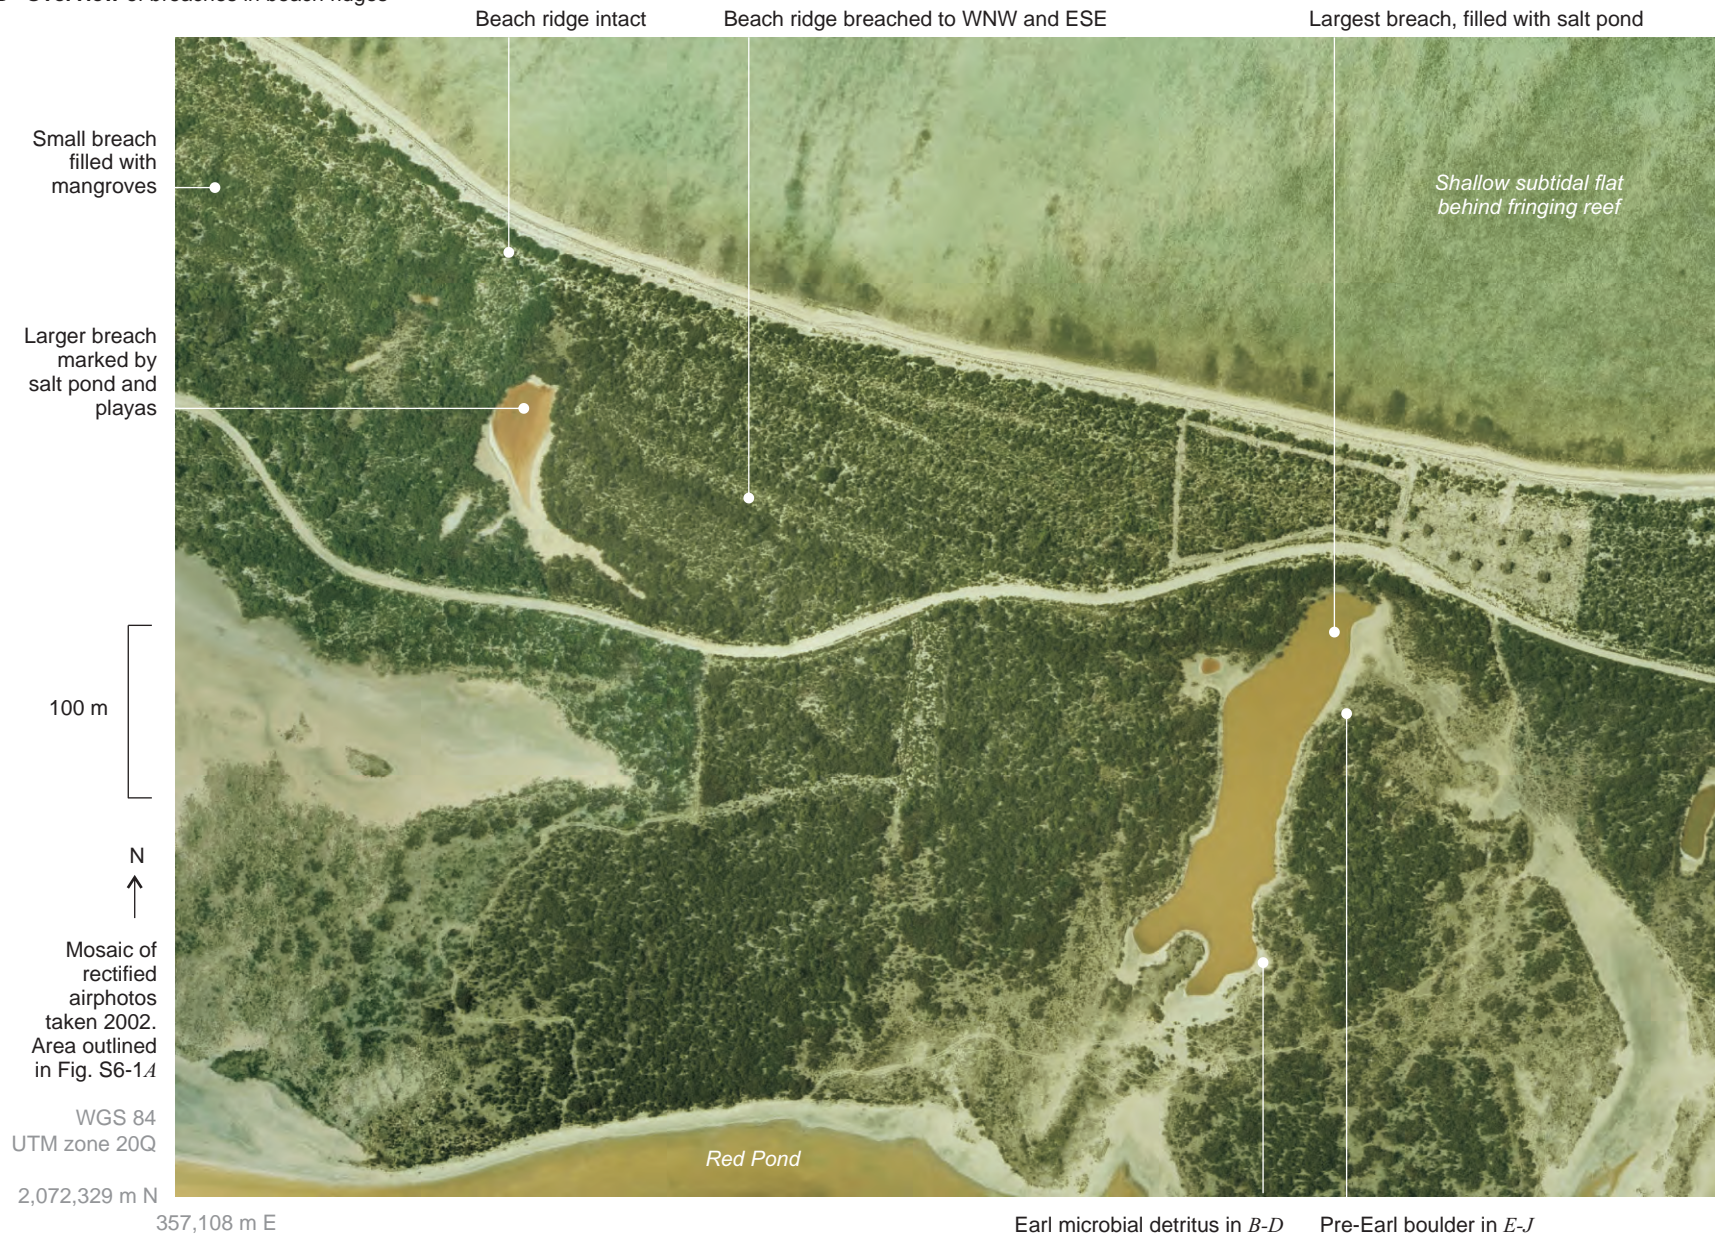



**Figure S6-3 Microbial detritus and boulder juxtaposed in breach north of Red Pond [page 2 of 4]**

*B* **Microbial detritus** deposited by Hurricane Earl, variously desiccated

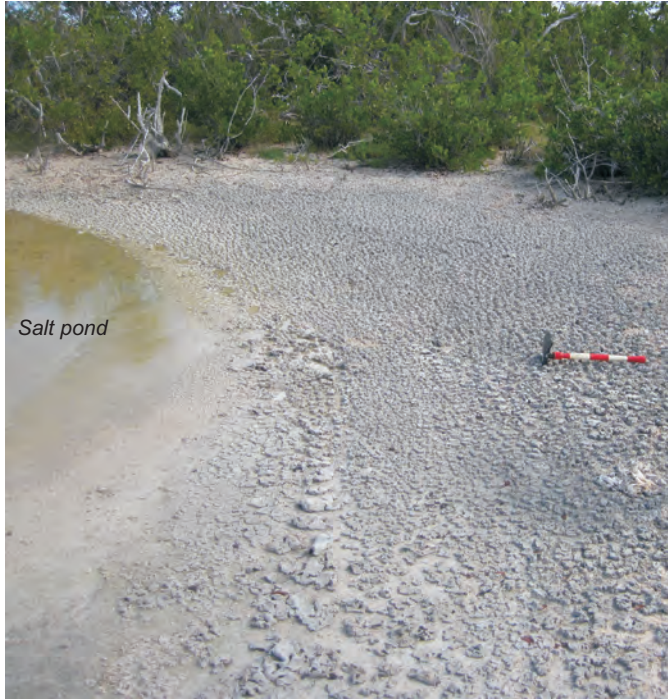

*C* **Green and red microbial mats** beneath the Earl deposits. Stripes on handle 0.1 m long

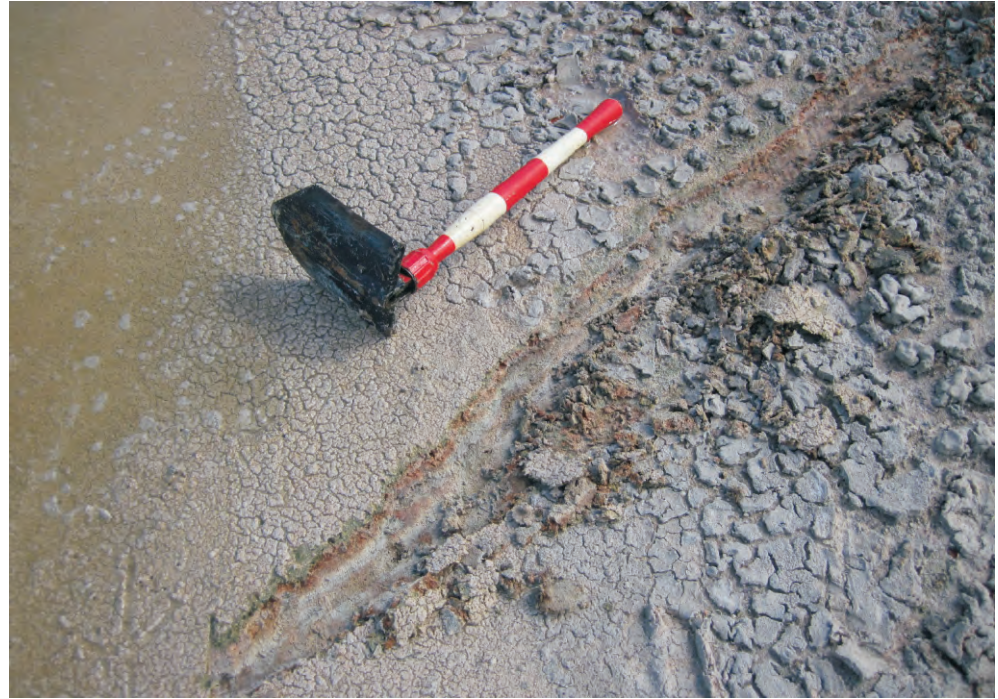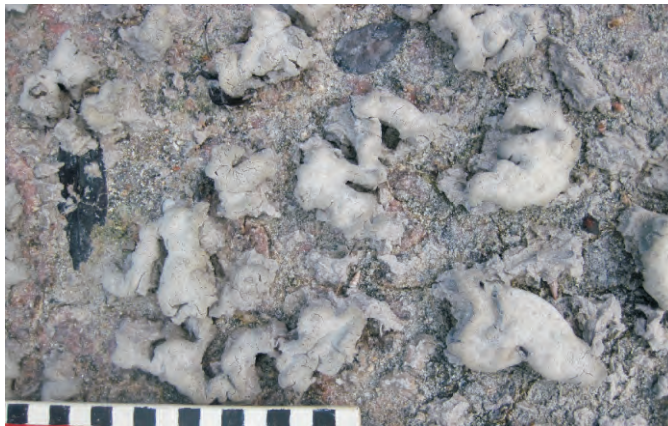

*D* **Leaves exhumed** by shrinkage of Earl deposits that had covered them. Divisions on ruler 1 cm long.



**Figure S6-3 Microbial detritus and boulder** juxtaposed in breach north of Red Pond [page 3 of 4]

*E* **Overview** to north

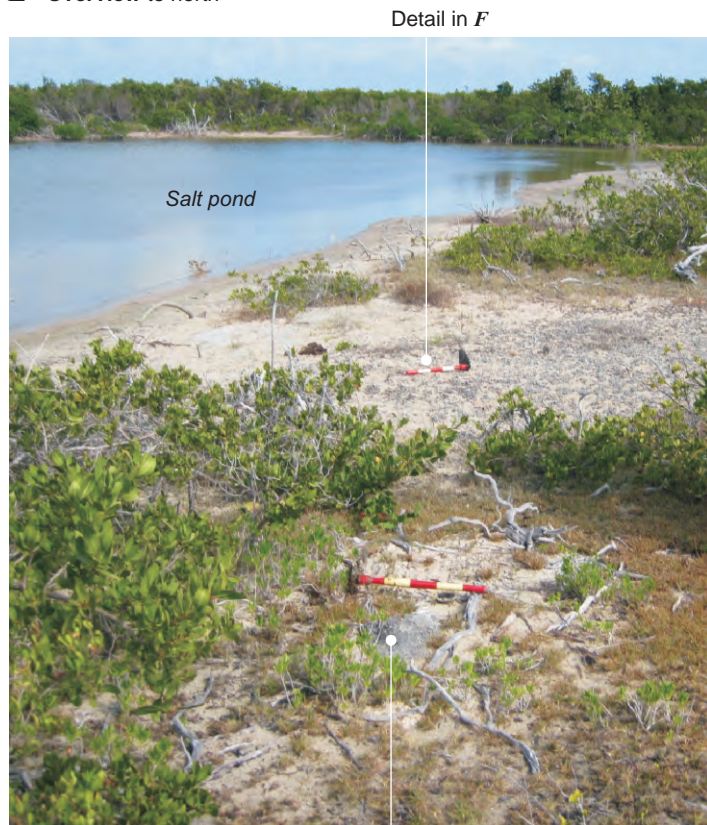

Stripes on shovel handles  
0.1 m long

Detail in *F*

*F* **Desiccated microbial detritus**

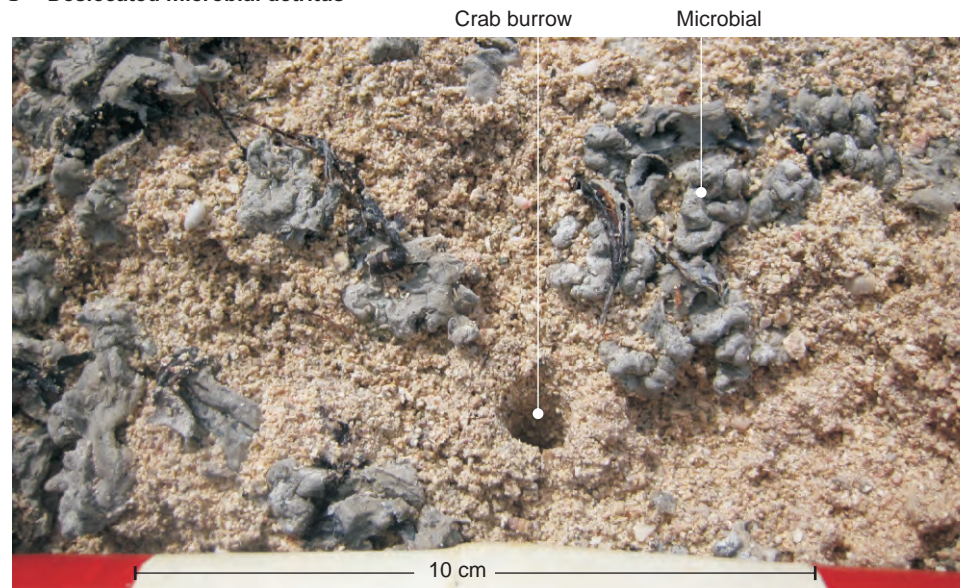

*G* **Boulder** embedded in sand above Earl high-water line. Additional details in *H-J*.

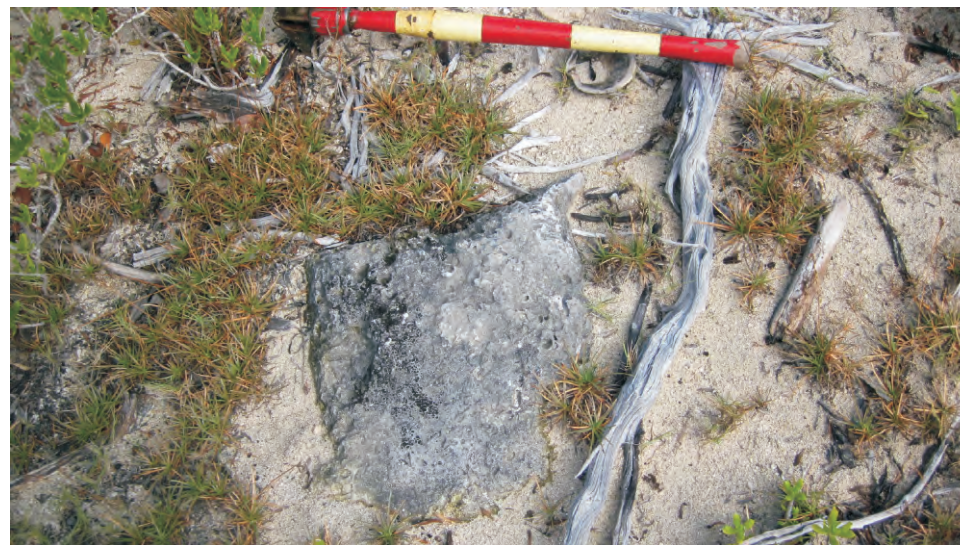



## Figure S6-3 Microbial detritus and boulder juxtaposed in breach north of Red Pond [page 4 of 4]

**H Overview** to north after excavation of boulder (compare with *E*)

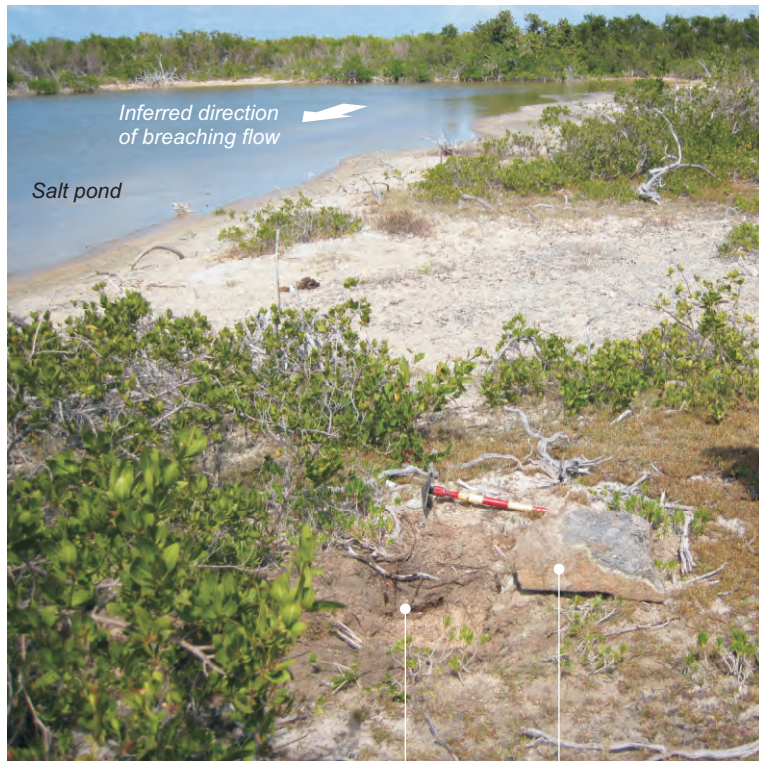

Pit sketched in *I*

Boulder removed from pit, used as display rack in *J*

**I Stratigraphic sketch** of pit in *H*

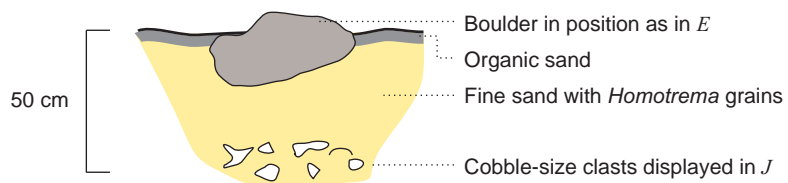

**J Clasts found beneath boulder.** All derived from reef or from subtidal flat landward of reef.

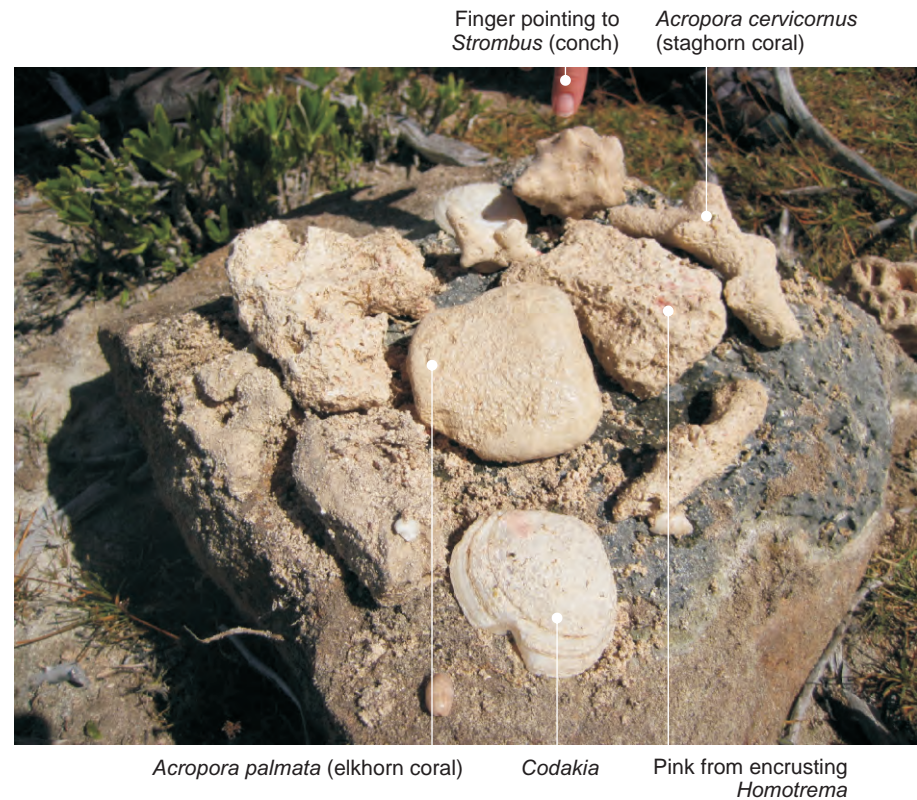

The boulder is made of caliche that resulted from weathering of Pleistocene deposits, as in Fig. S2-1*B*. The boulder was likely derived from caliche that underlies the adjoining breach; it was probably transported by flows that created or reoccupied this



## Figure S6-4 Microbial detritus mantling cobble field of northeast Red Pond

*A* Notch 27 months before Earl (March 2008)

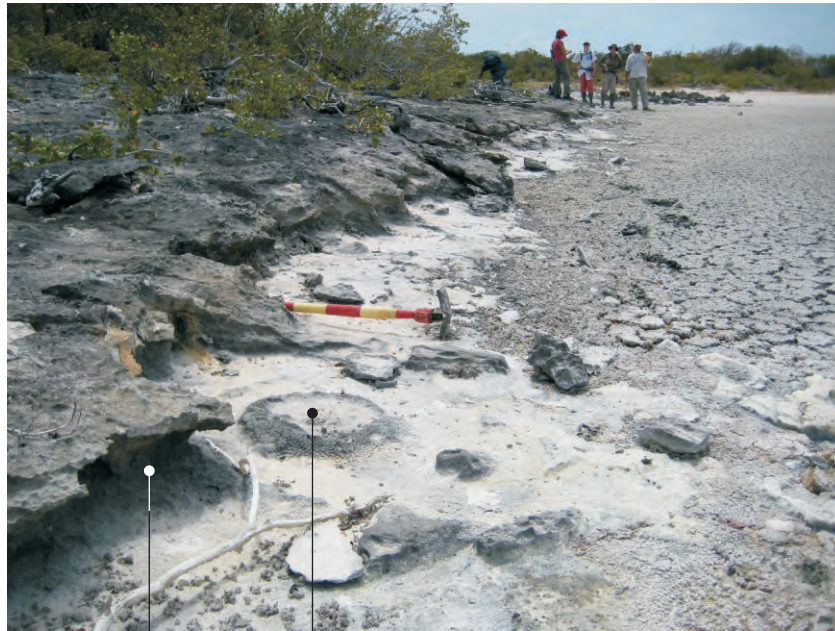

Pleistocene brain coral

Shoreline notch probably occupied by marine pond before overwash of 1650-1800

Cobbles and boulders scattered southward  
by catastrophic overwash into Red Pond in  
1650-1800 or earlier

Cobbles surrounded by  
microbial detritus!

Limestone partly coated by  
microbial detritus

*B* Notch 6 months after Earl (February 2011)

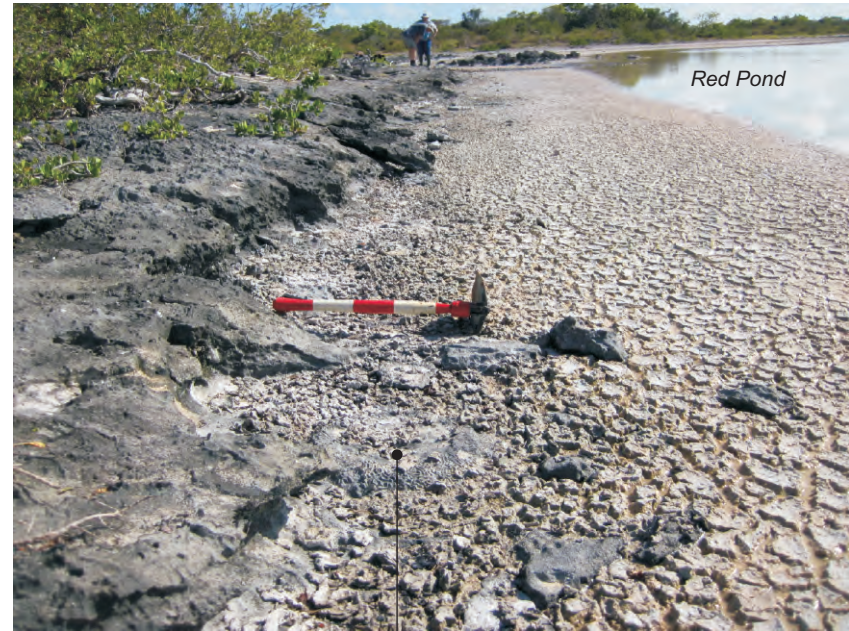

Coral head obscured by dried microbial detritus

*C* Cobbles 6 months after Earl (February 2011)

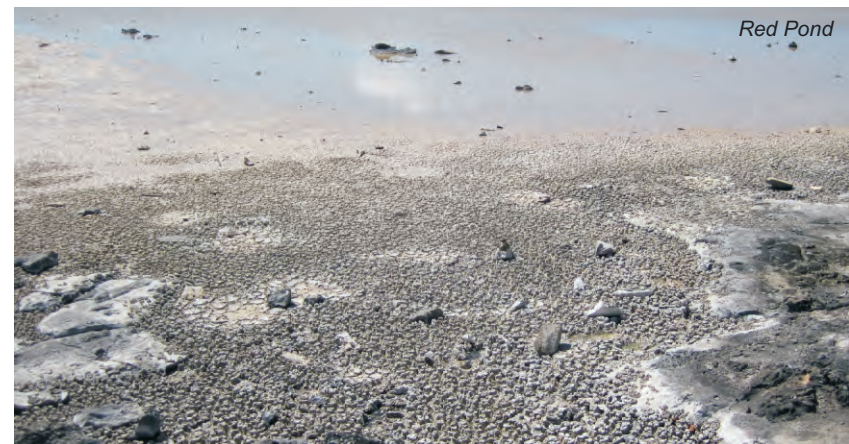



**Figure S6-5 Large head of the brain coral *Diploria* on seasonally flooded play west of Red Pond**

**A 18 months before Earl (February 2009)**

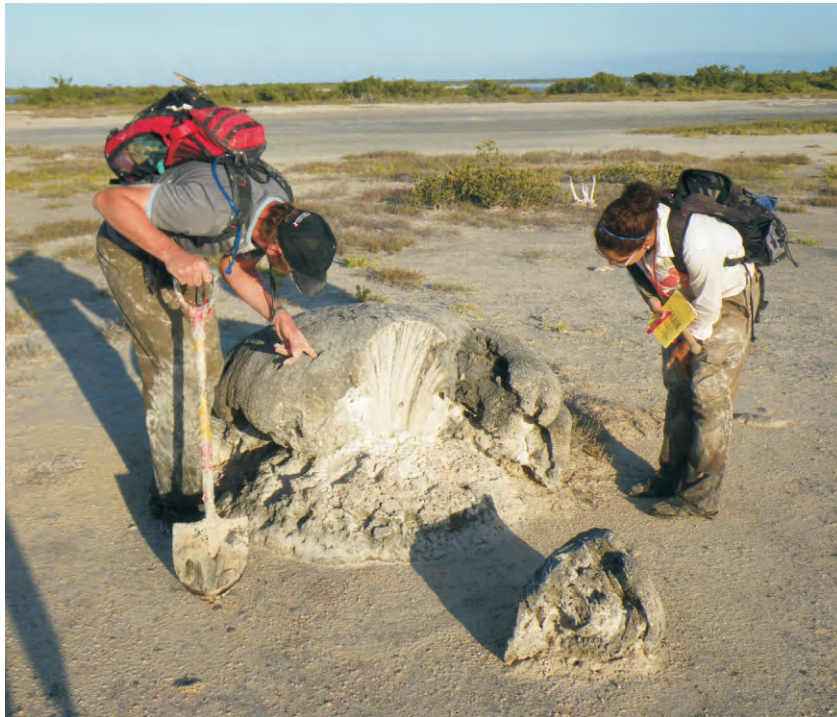

**B,C 6 months after Earl (February 2011)**

**B Dried microbial detritus** litters ground. Spalled coral fragment in foreground displaced little if any by Hurricane Earl despite the fragment's low density.

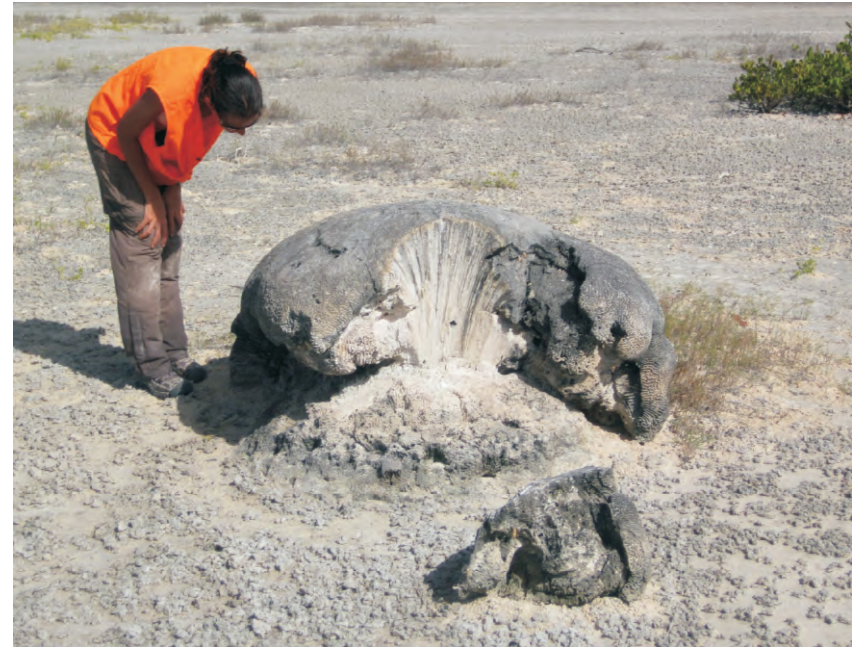

**D Radiocarbon ages of coral heads**

Ages measured on outer growth bands of coral heads that retain growth shape as above. Western heads moved 1.5 km if from fringing reef. All ages are in the range A.D. 1200-1450, if the area's marine-reservoir adjustment  $\Delta R$  is between 0 and -200  $^{14}\text{C}$  yr, with Marine09 calibration data of Reimer and others (2009) and Calib 6.1.0 software of Stuiver and Reimer (1986).

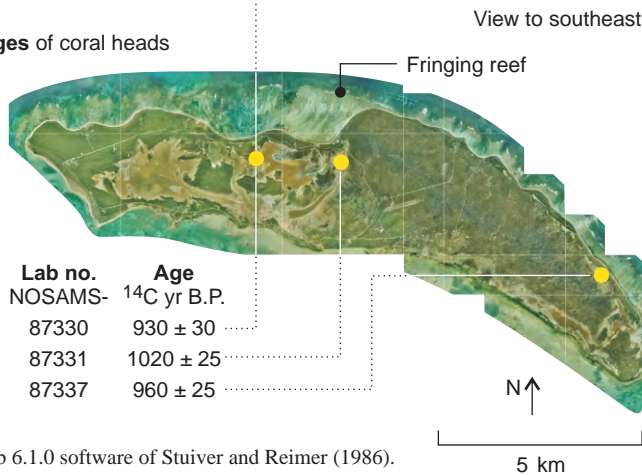

**C Stratigraphy 3 m east of coral head**

Dried microbial detritus

Sand, from overwash of A.D. 1650-1800?

Bioturbated top of marine-pond mud, 25 cm deep

At coral, flat base of head rests on sand at depth 40-50 cm

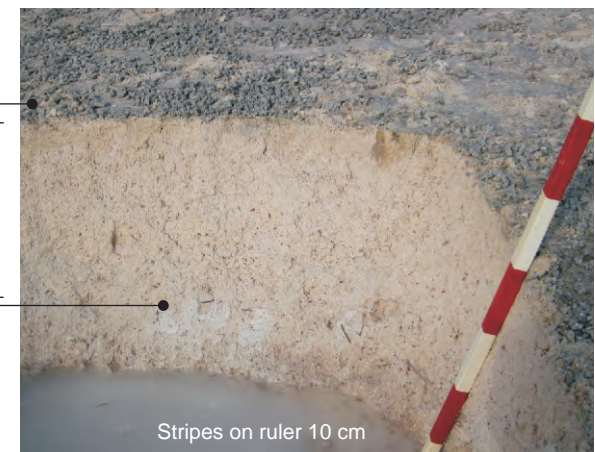

Supplement: Supplementary file 1 [file adgeo-38-21-2014-supplement.pdf]
